# Supplementary material for: Nonpharmacological Interventions for Managing the Dyspnea-Fatigue-Physical/Role Functioning Symptom Cluster in Lung Cancer Patients: A Systematic Review
Source: Hindawi journal article supplement (doi:10.1155/2024/9361352), 2024-04-12
Supplement: f1 [file 9361352.f1.zip]

Archive with 6 entries (6 files):
- Supplementary file 3 - intervention characteristics - all included.docx
- Supplementary file 5 - PRISMA checklist.docx
- Supplementary file 6 PRISMA_2020_abstract_checklist.docx
- Supplementary_file_1_-_search_strategy.docx
- Supplementary_file_2_-_study_characteristics_-_all_included.docx
- Supplementary_file_4_-_effects_of_the_intervention_and_risk_of_bias_-_all_included.docx
