# Supplementary material for: Nonpharmacological Interventions for Managing the Dyspnea-Fatigue-Physical/Role Functioning Symptom Cluster in Lung Cancer Patients: A Systematic Review
Source: Hindawi journal article supplement (doi:10.1155/2024/9361352), 2024-04-12
Supplement: f1 [file 9361352.f1.zip › Supplementary file 3 - intervention characteristics - all included.docx]

| **Study author, year, country** | Control group | | Intervention group | | | | | Additional |
| --- | --- | --- | --- | --- | --- | --- | --- | --- |
| NC | Content control group | NI | Content of intervention | Timing (pre/  during/  post treatment) | Setting | Frequency and duration of intervention |  |
| **Type 1: Exercise intervention** | | | | | | | | |
| Arbane et al., 2011, UK | 25 | Usual care  Monthly telephone calls from the research team, providing education only. | 26 | Additional to usual care:   1. Strength and mobility training 2. Home support program: paced exercise program (walking) + home strengthening program with encouraging visits | Post treatment | 1. Hospital 2. Home | For 12 weeks:   1. 2x/day 2. monthly home visits (3 in total) |  |
| Arbane et al., 2014, UK | 67 | Usual care | 64 | Additional to usual care:   1. Cycle training 2. Strength training | Post treatment | Hospital | 1. From day 1 post-op to day 5 post-op (or until discharge, if earlier): 1x/ day (aiming for 30 minutes/session 2. From day 1 post-op to day 5 post-op (or until discharge, if earlier): 1x/ day |  |
| Bhatia et al, 2019, Switzerland | 77 | Usual care | 74 | High-intensity interval training (HIIT) | Pre treatment | Hospital | For 2-3week:  3x/ week, the duration of repeated bouts of effort varies (between 10s and several min), with varying recovery periods in between |  |
| Brocki et al, 2014, Denmark and Sweden | 37 | One individual instruction in exercise training | 41 | Supervised out-patient exercise training sessions (warming up, aerobic exercise, muscle strength training, and cooling down/relaxation) | Post treatment | Hospital | For 10 weeks: 60 min. /week |  |
| Brocki et al, 2015, Denmark, Sweden, and Belgium | 34 | Usual physiotherapy | 34 | Additional to usual physiotherapy:  Inspiratory muscle training (IMT) | Post treatment | Mostly supervised during hospital stay and unsupervised after discharge  (home) | For 2 weeks: 2x/ day (starting one day pre-op and continuing for 2 weeks post-op) |  |
| Brocki et al, 2018, Denmark and Sweden | 34 | Usual postoperative physiotherapy | 34 | Additional to usual postoperative physiotherapy:  Postoperative inspiratory muscle training (IMT) | Post treatment | Mostly supervised during hospital stay and unsupervised after discharge  (home) | For 2 weeks: 2x/ day (from day before surgery to 2 weeks after surgery) |  |
| Cavalheri et al, 2016, Australia | 8 | Usual care | 9 | Exercise training to improve aerobic capacity and muscle strength:   1. Aerobic training (walking/cycling) 2. Resistance training (upper/lower limbs). | Post treatment | Hospital, supervised by senior physical therapists | For 8 weeks: 60 min sessions 3x/week |  |
| Lai et al, 2016, China | 30 | Usual preoperative respiratory management | 30 | Systematic and highly intensive preoperative PR training:   1. Abdominal breathing training 2. Expiration exercise 3. Aerobic endurance training | Pre treatment | Hospital, supervised by physiotherapist | Daily activities for 7 days:   1. 2x/day, 15 to 20 minutes 2. 3x/ day for 20 minutes 3. 30 minutes daily |  |
| Cheung et al, 2021, China and Taipei | 11 | Self-management (written exercise guidelines) | 10 | Aerobic and strengthening exercises + self-practice: moderate intensity aerobic exercise | During | Gym, supervised + home | For 12 weeks: 60 min., 2x/ week + 90 min. 1x/ week self practice |  |
| 9 | Tai-chi + self-practice | _ Supervised + home | For 12 weeks: 60 min., 2x/week, + 30 min., 3x/week self practice |
| Edvarsen et al., 2014, Norway | 31 | Usual postoperative care | 30 | a. High-intensity endurance training (HIIT): walking on a treadmill  b. Strength training: the leg press, leg extension, back extension, seat row, bicep curls and chest-and-shoulder press  c. Inspiratory muscle training (IMT) | Post treatment | Fitness center supervised by highly qualified personal trainers and physiotherapists | For 20 weeks:   1. 3x/ week 60 min. 2. 3x/ week 60 min. 3. Daily |  |
| Egegaard et al., 2019, Denmark | 7 | Usual care | 8 | Additional to usual care:  moderate-to-high intensity aerobic interval training | During treatment | Hospital, supervised by an exercise physiologist or a physiotherapist | For 7 weeks: 20 min. session, daily (Monday until Friday) |  |
| Granger et al., 2013, Australia | 7 | Usual care (Protocolized inpatient respiratory physiotherapy) | 8 | Exercise intervention additional to usual care:   1. Inpatient (walking, stationary cycling, resistance exercises and stretching exercises) 2. Outpatient exercise program:   Aerobic, resistance and stretching exercises; phone call to encourage adherence; domiciliary visits | Post treatment | Hospital + home | 1. Until discharge home: 2x/ day 2. For 8 weeks: 60 min. session, 2x/day; 30 min walking, 1x/day; one phone call weekly; 3 visits from physiotherapist |  |
| Henke et al., 2014, Norway and Germany | 11 | Usual physiotherapy | 18 | Additional to usual care  a. Endurance training: walking and stair walking exercise  b. Strength training: a bridging exercise, biceps curl, triceps extension  c. Breathing techniques | During treatment | Hospital | Started with the first day chemotherapy and ended after completing the 3rd cycle of chemotherapy   1. 5x/ week (6 min. walking, 2 min. Stairs) 2. Every other day of the week 3. 5x/week |  |
| Hwang et al., 2012, Taiwan | 11 | Usual care | 13 | Exercise training on a treadmill or cycling ergometer | During treatment | Hospital | For 8 weeks: 3x/week for 24 sessions of 30-40 minutes |  |
| Jastrzebski et al., 2015, Poland | 8 | Usual care | 12 | Pulmonary rehabilitation:   1. Nordic Walking 2. Aerobic and respiratory exercises 3. Resistance training 4. Exercise of respiratory muscles and peripheral muscles of upper and lower extremities | During treatment | Hospital | For 8 weeks: Four 2-week rehabilitation cycles, each preceded by a round of chemotherapy:   1. 1x/day for 45 min., at least 5 days a week 2. 1x/day for 30 min., 5 times a week 3. 1x/day for 30 min. 4. _ |  |
| Johnson et al., 2019, Sweden | 54 | Usual care | 53 | Physiotherapy   1. Preoperative treatment: individual preoperative physiotherapy information and instructions during admission day 2. postoperative treatment: individually adapted early mobilization, deep breathing exercises and exercises for thoracic and shoulder range of motion 3. postoperative information: advice regarding physical activity | Pre- and post treatment | Hospital | 1. 5-10 minutes 2. 1-2x/day 10-30 minute session, 6x per week (Sundays not included) 3. Prior to discharge |  |
| Johnson et al., 2019b, Sweden | 28 | Usual care | 26 | Physiotherapy   1. Preoperative treatment: brief individual information regarding mobilization and breathing exercises 2. postoperative treatment: individually adapted mobilization and ambulation, exercises for range of motion and breathing exercises | Pre- and post treatment | Hospital | 1. 5-10 minutes individual infosession during admission day 2. During the first two days (20-30 minutes per session, sundays not included). From the 3th day: an adapted treatment according to the patients’ status |  |
| Licker et al., 2016, Switzerland | 77 | Usual care | 74 | Usual care + HIIT (cycling training, leg press, leg extension, back extension, seat row, biceps curls or chest-and-shoulder press, advice regarding active mobilization and risk factor management) | Pre treatment | Hospital, supervised by physiotherapists + home | For 3-4 weeks:  2-3x/week (7 to 13 supervised cycling training sessions) |  |
| Molassiotis et al, 2014, Hong kong, UK, Cyprus | 23 | Usual care | 24 | Inspiratory muscle training | NR | Hospital + home | For 12 weeks:  5 IMT sessions weekly for a total of 30 mins/day |  |
| Rotolo et al., 2019, Italy | 24 | Chest physiotherapy with positive expiratory pressure:   1. A supervised physiotherapy intervention (peripheral muscle training on a cycle ergometer and breathing exercise) 2. a supervised physiotherapy intervention (they were support in coughing and encouraged to repeat breathing exercises using an incentive spirometer) 3. 3 supervised physiotherapy sessions with PEP bottle | 26 | Expiratory flow accelerator device:   1. A supervised physiotherapy intervention (peripheral muscle training on a cycle ergometer and breathing exercise) 2. A supervised physiotherapy intervention (they were support in coughing and encouraged to repeat breathing exercises using an incentive spirometer) 3. Supervised physiotherapy sessions with EFA device | 1. Pre treatment 2. Post and pre treatment 3. Post treatment | Hospital | 1. 2x/ day, 3 to 4 days before surgery 2. 5 times/hour 3. 3 supervised physiotherapy sessions with EFA/ PEP device (20 min.) |  |
| Rutkowska et al., 2019, Poland and VS | 10 | Usual care | 20 | Exercise training program:   1. Individualized, fitness and respiratory exercises 2. Training on a cycle ergometer or treatmill 3. Resistance exercise 4. Nordic walking 5. Relaxation training | During | Hospital | 5 sessions per week, for 4 weeks (on day 7-20 and day 28-41):   1. 30 min of fitness and respiratory exercises, 30 min of respiratory exercises 2. 20-30 min training on a cycle ergometer or treatmill 3. NR 4. 45 min Nordic walking 5. NR |  |
| Rutkowska et al., 2021, Poland | 8 | Usual care | 18 | Exercise training program:   1. Individualized, fitness and respiratory exercises 2. training on a cycle ergometer or treatmill 3. resistance exercise 4. Nordic walking 5. Relaxation training | During | Hospital | 5 sessions per week, for 4 weeks (on day 7-20 and day 28-41):   1. 30 min of fitness and respiratory exercises, 30 min of respiratory exercises 2. 20-30 min training on a cycle ergometer or treatmill 3. NR 4. 45 min Nordic walking 5. NR |  |
| Scott et al., 2021, USA | 23 | Stretching attention control | 67 | Three different regimens:   - 1. aerobic training (AT)—cycle ergometry at 55% to >95% of peak oxygen consumption (VO2peak);   2. resistance training   (RT)—lower and upper extremity exercises at 50–85% of maximal strength;   - 1. combination training (CT)—AT plus RT | Post treatment | Hospital | 48 sessions, thrice weekly, for 16 weeks. All sessions were 20–  60 min per session depending on intensity |  |
| Sebio Garcia et al., 2016, Spain | 12 | Usual care | 10 | Rehabilitation programme:  a. Moderate endurance training: cycle-ergometer  b. Strength training: elastic bands, body-weight exercises  c. Breathing exercises | Pre treatment | 1. Hospital 2. Home | 60 min.   1. 3-5x/ week, 30 min. 2. 3-5x/ week 3. 2x/ day |  |
| Stefanelli et al., 2013, Italy | NR | Surgery (S): surgery according to the usual preoperative protocol | NR | Rehabilitation: preoperative outpatient intensive PRP based on high-intensity training of both upper- and lower-limb muscles | Pre treatment | Hospital | For 3 weeks:  15 sessions of 3 hours, from monday to friday |  |
| Tan et al., 2019, Malaysia | 31 | Usual care | 32 | Additional to usual care: A mindful breathing session with professional guidance | NR | Hospital | A single 20-minute session |  |
| Wang et al., 2020, China | 34 | Usual pre- and post-surgery care | 31 | Breathing exercises program:   1. Abdominal breathing training 2. Pursed-lips breathing 3. Incentive spirometry exercises 4. Blow balloon training | Pre and post treatment | Hospital | Breathing exercises 2x/ day:  From admission to 1 day before surgery: 15 – 20 min.  1 day after surgery: 5 – 10 min.  Day 2 after surgery until discharge: 15-20 min. |  |
| Zhang et al., 2015, China | 44 | Low-impact exercise | 47 | Tai chi exercise (warm-up; both hands rise to shoulder level; curving back arms; stepping sideways and moving arms; moving hands, diagonal strides; standing on one leg; stepping and pushing; and both hands fall to the side, left leg drawn to the right leg) | During treatment | At home or in the community | A one-hour session every other day for 12 weeks |  |
| Dimeo et al., 2004, Germany | 35 | Relaxation training | 34 | 1. Aerobic exercise group: biking on a stationary bike, following an interval-training pattern 2. Relaxation training: contraction and relaxation of muscle groups | Post treatment | Hospital | For 3 weeks:   1. 30 minutes, 5x/ week   -First week: 5x3 min per day  -Second week: 4x5 min per day  -Third week: 3x8 min per day   1. 3x/week 45 min |  |
| Salhi et al., 2015, Belgium | 24 | Usual follow up | CRT: n=24 | Conventional resistance training   1. Aerobic training on the bicycle and treadmill at 70% of the respective maximal workload (Wmax) and speed 2. Resistance training on multigym equipment | Post treatment | Hospital | 3 sessions per week for 12 weeks:   1. 20 minutes 2. starting with three sets of eight repetitions for each exercise at 50% one-repetition-maximum |  |
| WBVT: n=22 | Whole body vibration training   1. Aerobic training on the bicycle and treadmill at 70% of the respective maximal workload (Wmax) and speed 2. Exercises on the vibration platform (FITVIBE, Gymna, Belgium) | Post treatment | Hospital | 3 sessions per week for 12 weeks:   1. 20 minutes 2. starting with three sets of 30s for each exercise at 27 Hz |
| Salhi et al., 2014, Belgium | 10 | Usual follow up | 16 | Rehabilitation training:   1. Warming-up 2. Resistance training of the upper- and lower limb muscles (conventional resistance training or whole body vibration training) | Post treatment | Hospital | 3 sessions per week for 12 weeks:   1. 20 minutes 2. NR |  |
| **Type 2: Acupuncture / acupressure intervention** | | | | | | | | |
| Cheng et al, 2017, China | 14 | Placebo acupuncture | 14 | Acupoint stimulation  (LI-4, Ren-6, St-36, KI-3, and Sp-6) | During treatment | Hospital | For 4 weeks: 45 min., 2x/ week followed by 2 weeks of follow-up |  |
| Dogan, 2020, Turkey | 31 | Usual care | 29 | 56 sessions of acupressure (P-6, LU-1, LU-10) | Post treatment | Perform on their own (home) or by the caregiver (NR) | For 4 weeks: 18 min., 2x/ day |  |
| Hou et al., 2017, China | 56 | Routine nursing care | IGb: 49 | Sham transcutaneous electrical acupoint stimulation (TEAS) applied at nearby non-acupoint sites  (CV6, UB17, ST36) | During treatment | NR | For 28 days: daily 30-minute |  |
| Igc: 57 | TEAS applied to 3 acupoint sites | Hospital |
| Lin et al, 2019, China | 34 | Usual care | 34 | Group A  Auricular acupressure (AA) using Semen Vaccariae + regular telephone follow-up and home visits to enhance AA adherence | During treatment | Hospital and Home (patient and caregiver) | For 9 weeks:  5 sessions/ day (in the morning, after each meal, and before bedtime), each acupoint werepressed for 20 to 30s,  4-6x/ session  The length of whole intervention for the study was three treatment courses (three cycles of chemotherapy). |  |
| 32 | Group B  AA using magnetic beads + regular telephone follow-up and home visits to enhance AA adherence |
| Strong et al., 2016, California | 2 | Usual care | 4 | Acupressure additional to usual care | NR | Hospital | 4 days, twice per day |  |
| 5 | Placebo (usual care + acupressure placebo) |
| Tang et al., 2014, Taiwan | 16 | Sham acupressure | 17 | Acupressure with essential oils  Acupoints: L14, ST36, SP6 | During treatment | Home (self-admister) | For 5 months: 6 min., daily in the morning |  |
| 24 | Acupressure only  Acupoints: L14, ST36, SP6 |
| **Type 3: Diet intervention** | | | | | | | | |
| Gioxari et al., 2021, Greece | 15 | General nutritional guidelines (phone interviews) | 15 | Personalised Mediterranean diet (MD) plan:   1. Individual counselling coupled providing daily dietary plans with educational booklets, food diaries, and individual nutritional advice   + training on meal preparation techniques | During treatment | Hospital, supervised by experienced dietitians | For 3 months:   1. Every 15 days |  |
| Jiang et al., 2017, China and Korea | 26 | Chemotherapy alone | 34 | 300 mg of fermented red ginseng (FRG) extract additional chemotherapy | During treatment | Home | For 60 days: 3000mg of FRG extract daily |  |
| Kiss et al., 2016, Australia | 12 | Usual care | 12 | Dietary counselling:   1. Diet history 2. Individual dietary counselling + supplements 3. Liaise with patient to optimize symptom management | Pre treatment | Home (over the phone) | 1 week prior to RT |  |
| Dietary counselling:   1. Diet history 2. Individual dietary counselling + supplements 3. Liaise with patient to optimize symptom management 4. Education on nutrition | During treatment | Hospital, supervised by experienced dietitians | Weekly during RT |
| Dietary counselling:   1. Diet history 2. Individual dietary counseling | Post treatment | Home (over the phone) | For 6 weeks: 2x/ week |
| Sanchez-Lara et al., 2014, Mexico | 46 | Isocaloric diet | 46 | Oral nutritional supplement containing EPA (ONS-EPA) additional to isocaloric diet | During treatment | Home | 8 weeks |  |
| Tian et al., 2010, China | 20 | Chemotherapy (treated with vinorelbine plus cisplatin (NP) or gemcitabine plus cisplatin (GP) | 20 | Feiji Recipe (group A) | During treatment | Home | For 2 months: one treatment contained 250 ml of herbal preparation, each subject received two treatments a day |  |
| Van der meij et al., 2012, The Netherlands | 20 | Isocaloric control nutritional supplement | 20 | Energy- and protein rich nutritional supplement | During treatment | Hospital | During 5 weeks: 2 cans a day |  |
| **Type 4: Multicomponent intervention** | | | | | | | | |
| Bade et al., 2021, USA | 20 | Usual care | 20 | 1. In-person teaching session regarding the benefits of physical activity in lung cancer 2. A FitBit® Flex2 accelerometer (and set-up on participants’ phone) 3. Individualized walking goals based on participants’ average daily step count during week 1 4. Gain-framed text messages | During and post treatment | Home | For 12 weeks   1. 15 min. for 12 weeks 2. 1x/ day for 12 weeks 3. NR 4. 2x/ day, for 12 weeks |  |
| Bredin et al, 1999, UK | 52 | Usual care  Monitoring breathlessness and its effects on life | 51 | Package of interventions tailored to individual patients (breathing control activity pacing, relaxation techniques, psychosocial support) | Post treatment | Nursing clinic | For 8 weeks (and for not less than three weeks): 1x/ week |  |
| Cheng et al, 2020, China | 29 | Routine nursing | 29 | Lung rehabilitation therapy additional to routine nursing:   1. Exercise training 2. Respiratory muscle training 3. Nutritional therapy | Post treatment | Hospital | For 12 weeks   - 1. 3-5x/ week   2. _   3. _ |  |
| Corner et al, 1996, UK | 9 | Usual care | 11 | Counseling, breathing re-training, relaxation and teaching coping and adaptation strategies | Post treatment | Nurse led clinic in a specialist cancer centre | Over 3 to 6 weeks: 1x/ week approximately 60 min. |  |
| Dhillon et al, 2017, Australia, USA, The Netherlands, Camperdown, Randwick, Concord, and Sydney. | 55 | Usual care | 56 | Physical activity program:   1. supervised physical activity 2. behaviour support sessions 3. unsupervised home physical activity sessions | Post or during treatment | Hospital + home | 8 weekly sessions of approximately 60 min.   1. 30-45 minutes 2. 15-30 minutes |  |
| Edbrooke et al, 2019, Australia | 47 | Usual care | 45 | Aerobic and resistance exercise with behavior change strategies and symptom support additional to usual care   1. Home visit 2. Telephone calls 3. Extra home visits 4. Contact to review and progress exercise programmes 5. Walking (as commonly preferred form of aerobic exercise) 6. Resistance training | Post treatment | Home + hospital | For 8 weeks:   1. Once at start of the program 2. 2x/week 3. 2x/ week 4. Monthly, between 9 weeks and trial completion 5. Minimum 10 min., 2x/ week at a moderate intensity 6. 2-3 sessions week |  |
| Gunes et al., 2020, Turkey | 30 | Usual care | 30 | Intervention   1. Education on relaxation exercises (presentation, training booklet) 2. Relaxation exercises at home 3. Phone calls | During treatment | Hospital + home | For 4 weeks:   1. 20-25-minute presentation 2. 2x/day for 4 weeks 3. 1x/ week |  |
| Hoffman et al., 2016, US | 36 | Usual care | 37 | 1. Initial home visit (connecting the Nintendo Wii Fit Plus, teaching the exercise intervention, and reinforcing the CRF self-management education and exercise safety 2. Phone visit (to answer any questions and concerns regarding the intervention) 3. Follow-up home visit (with additional visits scheduled on request of the participant): teaching self-efficacy CRF self-management educations 4. Diary (to record exercise activity each week) 5. Exercise program (warm-up walking and balance exercises; with the goal of walking with the Wii of 30 minutes per day during week 6) 6. Exercise program safety checklist (to review ensuring safety prior to the start of exercise) | Post treatment | Home | For 6 weeks:   1. At start 2. Within 24 hours after initial home visit 3. At start of week 2, average number of home visits = 2,8 4. 1/day, each week 5. Walking with the Wii: 30 min./day, for 6 weeks   Balance exercises: 5x/ week, for 6 weeks   1. Provided prior to the start of exercise. |  |
| Johnson et al., 2015, UK | 104 | 1 session of complex breathlessness intervention | 52 | 3 sessions of complex breathlessness intervention   1. Breathing control 2. Pacing/ prioritising 3. Relaxation 4. Anxiety management   Sessions were supported by written and DVD/video reinforcement material   1. Telephone call from therapist | NR | Hospital or home | For 3 weeks: 60 min. sessions, 3 x/week (at week 1, 2, and 3)  f. 1 week after the last session |  |
| Lau et al., 2020, Hong Kong | 81 | Cognitive behavioral therapy (CBT): relaxation; identification of dysfunctional coping patterns, thoughts and values; use of mood diary, reappraisal, cognitive continuum, cost-benefit analysis and positive self-statements for adjusting dysfunctional emotional responses and thoughts; construction and implementation of plans of pleasurable activities | 76 | Integrative body-mind-spirit intervention (I-BMS): psycho-education about holistic health and practiced mind-body exercises (e.g., acupressure, Qigong-inspired movements), and mindfulness-based relaxation (e.g., meditation) | NR | Hospital, facilitated by 2-3 trained facilitators | For 8 weeks: 3-h/week sessions | 8-12 participants per group (closed-group) |
| Liu et al, 2020, China | 42 | Usual care | 43 | Multimodal prehabilitation interventions:   1. Aerobic exercises 2. Resistance exercises 3. Respiratory training 4. Nutritional counseling with whey protein supplemen- tation 5. Psychological adjustment 6. Conventional guidance | Pre treatment | Home | For 2 weeks   1. 30 min. for at least 3 days/week 2. 2x/ week, each action was performed 10–12 times and repeated for 3 sets 3. 10 min. at least 2x/day 4. 1x/ day protein intake, 60 min. after exercise 5. Listening every day to the music before sleeping |  |
| Molassiotis et al, 2021, China and Vietnam | 78 | Usual care | 78 | Qigong   1. A series of simple, repeated practices (body posture/movement, breathing, and meditation) 2. Qigong training 3. Qigong home practice 4. Telephone calls from the researcher 5. Follow-up: additional unsupervised practice | Post treatment | Hospital + home | For 6 weeks:   1. NR 2. 90 min., 2x/ week during first 2 weeks 3. 5x/week for the next 4 weeks: min. 30 min./ day 4. 1x/week 5. Daily, 6 weeks, post-intervention |  |
| Morano et al, 2013, Brazil and Spain | 12 | CPT : breathing exercises for lung expansion + educational classes   1. Instructions about the techniques for lung expansion 2. Educational classes (same as in PR group). | 12 | PR: strength and endurance training + educational classes   1. The upper limb incremental test 2. Lower extremity endurance training on a treadmill 3. Inspiratory muscle training (IMT) 4. Flexibility, stretching, and balance exercises as part of the warmup and cooldown section of each exercise session 5. Educational classes about the importance of preoperative and postoperative care and knowledge of the surgical process, energy conservation techniques, relaxation and stress management techniques, focus on nutrition, and the need to seek health services when necessary | Pre treatment | Hospital | 5 sessions per week for 1 month:   1. Minimum 15 repetitions per min. 2. the duration was built up to 30 minutes during the first 3 weeks of the program, with increments of 10 minutes each week 3. Daily IMT sessions of 10 to 30 min. duration 4. Daily 5. NR |  |
| Quist et al., 2018, Denmark | 119 | Late initiated postoperative rehabilitation (14 weeks after surgery (LRG)) | 116 | Early initiated postoperative rehabilitation (14 days after surgery (ERG))   1. Group-based exercise sessions (the exercise consisted of an individually prepared supervised strength exercise and a group-based cardiovascular exercise) 2. Individual counseling sessions 3. Group-based lessons in health-promoting behavior 4. If the participants had special needs in terms of smoking cessation, nutritional counselling or patient education, this was offered too. | Post treatment | NR | For 12 weeks:   1. 24 exercise sessions: 60 min/session, 2/week on nonconsecutive days 2. 3 sessions 3. 3 lessons |  |
| Stigt et al., 2013, The Netherlands | 26 | Usual care | 23 | Rehabilitation program:   1. Exercise training supervised by physiotherapists   Scheduled visits to a specialized pain team and medical social worker or referral to a specialized facility | Post treatment | Hospital | During 12 weeks, starting 1 month after discharge:   1. 2x/week   In case of psychosocial problems |  |
| Sunahara et al., 2023, Japan | 18 | Postoperative rehabilitation program | 16 | postoperative  rehabilitation program and received physical activity instruction preoperatively and at  discharge  instructions twice on promoting  physical activity during the hospitalization period (preoperatively  and at discharge) in addition to the postoperative exercise  program. | Pre and post treatment | Hospital | Instructions: twice, for 20 min.  Postoperative exercise program: once a day for 20 min. per session, 5 times a week. |  |
| Yorke et al., 2015, UK and China | 54 | Usual care | 53 | Additional to usual care   1. Intervention training sessions 2. Controlled breathing techniques 3. Cough easing techniques 4. Acupressure 5. Information pack 6. follow-up phone calls | NR | Community setting, home or in a hospital | For 12 weeks   1. 2 sessions of 60 min. (second session 1 week after first session) 2. Once, 2 weeks after the second face-to-face training session |  |
| Yorke et al., 2022, UK | 131 | Usual care | 132 | 1. Controlled breathing techniques: consisting of diaphragmatic breathing exercises or pursed lip breathing, practised twice a day or used as needed beyond that for episodes of intense breathlessness and/or anxiety. 2. Cough suppression techniques: includes education (capacity for voluntary cough easing), identifying warning signs for cough and replacing with sips of water, modified swallow technique, huff cough technique or relaxed throat breathing. 3. Acupressure: a small number of acupressure points were taught: L7, L9 (for cough and dyspnea, located on the wrist areas), LI4 (for energy, located in hand), CV21 and CV22 (for cough and dyspnea, located in sternum) and ST36 (for energy, located in the knee). Patients could select any of these points in any combination to apply pressure for 1 min at least twice a day for symptom relief.   Exercise: Individually tailored exercise plan, for example, walking incrementally increasing distances in their local environment, and incorporating breathing techniques as required. | Post treatment | Hospital | - 1. twice a day or used as needed   2. _   3. 1 min. at least twice a day   4. individually |  |
| Yates et al., 2020, Australia | 63 | Usual care + face-to-face education session (Instruction of principles on managing dyspnea) | 81 | The combination of breathing re-training with individualized psychosocial support (tailored intervention) using evidence-based psycho-educational strategies:   1. Face to face instructional session (tailored instruction in 7 modules, assessment, supplementary resources to take home and individualized management plan) 2. Follow up phone calls | Post treatment | Hospital + home | For 4 weeks:   1. 60 min. at week 1 2. Weekly at week 2, 3, and 4 |  |
| **Type 5:** **Psychoeducational intervention** | | | | | | | | |
| Carlson et al, 2013, Canada | 176 | Minimal screening additional to usual care | 174 | An online routine screening for distress program on physical symptoms and common psychosocial and practical problems  Full screening group | During and post treatment | Hospital | In a period of 3 months: 2x screenings |  |
| 199 | An online routine screening for distress program on physical symptoms and common psychosocial and practical problems  Triage group (full screening + personal triage) |
| Chan et al, 2011, UK and Hong Kong | 70 | Usual care | 70 | Additional to usual care:   1. Educational package 2. Coaching of progressive muscle relaxation (PMR) additional to usual care 3. Telephone reminder to enhance participation in the week 3 sessions | During  Treatment | Hospital, delivered by registered nurses | a. 2 sessions: one week prior to the beginning of the course of RT, and reinforced 3 weeks after commencing RT  b. Daily  c. At the end of the second week |  |
| Choratas et al, 2020, Australia | 8 | Usual care | 11 | Educational programme additional to usual care:   1. PowerPoint presentation incorporating 2 video recordings (consisted of information about breathlessness) 2. Practical exercise (implementation of three non-pharmacological interventions: diaphragmatic breathing, IMT, handheld fan) | During treatment | Home, nurse-led | Over a period of 4 weeks :  2x 30 – 50 minutes according to patients’ and family caregiver’s needs |  |
| Fernandez-Rodriguez et al., 2019, Spain and Chile | 40 | Quality Life Evaluation | 50 | Behavioral Activation to encourage subjects to activate their sources of reinforcement and modify the avoidance responses | During treatment | Hospital, by a psychologist | Before each chemotherapy cycle |  |
| Huang et al., 2017, Taiwan | 28 | Usual care | 27 | A web-based health education program consisted of 6 parts:   1. personal assessment including symptoms, performance status and vital signs 2. explanations of laboratory data 3. information 4. symptom management 5. supportive care 6. questions and answers | During and post treatment | Home | For a period of 3 months:  15-20 min. sessions, 2x/ week |  |
| Huang et al., 2018, China | 15 | Cardiothoracic routine care | 13 | A self-efficacy enhancing intervention based on motivational interviewing   1. Face-to-face sessions in hospital 2. Additional telephone sessions | Post treatment | Hospital + home | Within a period of 3 months:   1. 2x 15-40 min sessions 2. 4x 15-40 min sessions after discharge |  |
| Krug et al., 2021, Germany | 78 | Usual care | 79 | Milestone Communication Approach (MCA) intervention:   1. structured, interprofessional (physician-nurse tandem) milestone conversations 2. follow-up phone calls by the nurse   An interprofessional communication training (for physician-nurse tandem) | During treatment | Hospital + home | 1. 45-60 min. 2. 20 min. about a week after each conversation , and at least 1x/month   Physician-nurse tandem: before the implementation of MCA, 4 days (one day a month) |  |
| Li et al., 2019, China | 79 | Tyrosine kinase inhibitors (TKIs) | 80 | TKIs + wellness education (physical therapy, coping and communication strategies, mental health education, spirituality, social needs, knowledge about lung cancer, nutrition, physical activity, symptoms, and pain management) | During treatment | Hospital | For 8 weeks: 6x 45-minute sessions of multidisciplinary components.  The sessions were offered on 3 different days each week. Patients attended the session of their choice. |  |
| Li et al., 2022, China | 20 | Usual care | 20 | Acceptance and Commitment Therapy (ACT) | During treatment | One face-to-face session in an independent meeting  room of the respiratory department and three videoconferencing-based  sessions via Tencent video conference software | 4 sessions (60–90 min/session), weekly |  |
| Moore et al, 2002, UK | 103 | conventional medical follow up | 100 | follow-up by nurse clinical specialists with phone follow-up and additional contact as necessary | Post treatment | Hospital +  home | For 12 months:  The mean number of contacts with patients was three per month  Monthly phone follow-up |  |
| Mosher et al, 2016, USA | 55 | Education/support: telephone conversations to direct patients to resources for practical and health information and psychosocial help | 51 | Telephone Symptom Management (TSM): telephone conversations to teach patients evidence-based strategies for managing anxiety, fatigue, breathlessness, pain | NR | Home (telephone-based) | 4x/ week 45-minute telephone sessions |  |
| Mosher et al, 2019, USA | 25 | Education/support condition | 25 | Acceptance and Commitment Therapy (ACT) | Post-treatment | Home (telephone-based) | 50-min. telephone sessions, 6x/ week |  |
| Ning et al., 2021, China | 49 | Routine nursing care after discharge | 46 | Nursed according to the Omaha system after discharge:   - Basic information files - A health guidance manual - Problem-based continuity of care  1. Face-to-face interview and completion of continuous care evaluation intervention score forms. 2. Telephone follow-up, including determination of continuous nursing effect scores 3. Face-to-face interview (20–30 min) including determination of a continuous nursing effect score | During treatment | Home + hospital | 1. 20-30 minutes, within 24 h of the end of chemotherapy 2. One week after chemotherapy 3. 20-30 minutes, before the next round of chemotherapy |  |
| Peng et al., 2019, China | 78 | Usual care | 82 | Supportive group psychotherapy:  each session based around 8 themes (exploration of life stories, implications of living with cancer, stress coping, mindfulness and feeling anxious, relationships and support, self-identity, hope, and moving forward), with in each session opportunity for individual expression, group discussion, teaching, and problem solving | Post treatment | Hospital | For 8 weeks: 90 min group psychotherapy, 1x/week |  |
| Porter et al., 2011, USA | 116 | Telephone-based sessions of education/support involving caregiver. Provision of participants with information regarding LC and its treatment in a supportive environment in which patients and caregivers were encouraged to discuss the treatment and symptoms | 117 | Telephone-based sessions of caregiver-assisted CST: symptom management strategies for pain, fatigue, dyspnea, psychological distress, … and to teach caregiver how to help the patients | Pre- during- and post treatment | Home | For 8 months: 14x 45 min. telephone-based sessions scheduled.  The frequency of sessions was tapered from weekly (Sessions 1-3) to biweekly (Sessions 4-10) to monthly (Sessions 11-14) |  |
| Tan et al., 2019b, China | 68 | Conventional education | 68 | Cognitive education in the format of mind maps | During treatment | Hospital | For 12 weeks: 1/week 40-min group teaching lecture |  |
| Yang et al., 2018, Singapore and Finland | 34 | Usual care | 35 | EQUIP intervention:  4 face-to-face educational sessions with a nurse, strategies and skills to cope with several symptoms; fatigue, breathlessness, worry) | During treatment | Hospital | 4 sessions of 30 minutes |  |
| Yanwei et al., 2018, China | 62 | NR | 64 | Well-ness education with instructions about:   1. Physical therapy 2. Coping and communication strategies 3. Mental health education 4. Spirituality 5. Social needs 6. Knowledge about lung cancer 7. TKI treatment 8. Nutrition 9. Physical activity 10. Symptoms and pain management | During treatment | Hospital | Over 8 weeks: 4x 30 min sessions |  |
| Yount et al., 2013, USA | 130 | Symptom monitoring alone | 123 | Symptom monitoring and automatic reporting of clinical relevant symptoms to clinical team + graphical longitudinal displays of symptoms to patients and their clinical teams | During | Hospital | Weekly for 12 weeks |  |
| Linn et al., 1982,  Florida | 58 | Usual medical therapy | 62 | Usual medical therapy + counseling | Post | NR | Before random assignment and at 1, 3, 6, 9 and 12 months |  |
| Schofield et al., 2013, Australia | 53 | Usual care | 55 | Tailored, multidisciplinary supportive care programme based on systematic needs assessment:   1. Session 1: On the basis of the needs assessment, referrals were made for symptom management, practical support, psychological therapy and spiritual support to the MDT. 2. Session 2: The second session was designed to reinforce important information and self-care advice, and more modules were delivered to address remaining or new concerns. | During treatment | Hospital | 1. 1 to 3 weeks after recruitment and contiguous with treatment commencing: 30 min. – 60 min. 2. At approximately the end of treatment: 30 minutes – 60 min. |  |
| Wangnum et al., 2013, Thailand | 30 | Usual care | 30 | Multidisciplinary education program in self-care group   1. Meeting 1 (brief instructions, meeting with physical therapist, meeting with nutritionist, and meeting with psychological nurse) 2. Meeting 2 (meeting with nutritionist and meeting with physical therapist) 3. Meeting 3 (meeting with psychological nurse, meeting with nurse at cancer unit, meeting with physical therapist, and meeting with nutritionist) 4. Meeting 4 (each specialist summarized the results and informed the participants that the study was terminated.) | During treatment | Hospital | 1. 90 minutes (15 min brief instructions + 30 min meeting with physical therapist + 30 min with nutritionist + 15 min with psychological nurse) 2. 60 minutes at week 3 (30 min with nutritionist + 30 min with physical therapist) 3. 60 minutes at week 6 (10 min with psychological nurse + 10 min with nurse at cancer unit + 20 min with physical therapist + 20 min with nutritionist) 4. At week 9 |  |
| **Type 6: Other** | | | | | | | | |
| Ahmedzai et al. 2004, UK | 12  (crossover) | 1. Oxygen-enriched air (72% N2, 28% O2) 2. Medical air (78,9% N2, 21,1% O2) | 12  (crossover) | Heliox28 gas mixture (72% He, 28% O2) | Pre treatment | Hospital | 5 min |  |
| Jiang et al., 2021, China | 34 | Usual care | 30 | Continuous positive airway pressure (CPAP) | Post treatment | Hospital | NR |  |
| Maddocks et al, 2009, UK | 8 | Usual care | 8 | Usual care + NMEC | After treatment | Hospital + home | For 4 weeks: 30 min/day |  |
| Maddocks et al, 2013, UK | 19 | Usual care | 30 | Usual care + NMEC | During treatment | Home | For 8 or 11 weeks: 30 min/day, min. 3x/ week |  |
| Ye et al., 2021, China | 43 | Routine nursing | 43 | Additional comfort nursing based on routine nursing (environmental nursing, mental nursing, skin and oral care, pain and training care, and diet care) | During treatment | Hospital | NR |  |

*Abbreviations*

*MD = mean difference between intervention and control group*

*NM = not measured*

*NS = the article reported that the results were not significant without reporting the exact p-value*

NS = not significant

NM = not measured
