# Supplementary material for: Nonpharmacological Interventions for Managing the Dyspnea-Fatigue-Physical/Role Functioning Symptom Cluster in Lung Cancer Patients: A Systematic Review
Source: Hindawi journal article supplement (doi:10.1155/2024/9361352), 2024-04-12
Supplement: f1 [file 9361352.f1.zip › Supplementary_file_1_-_search_strategy.docx]

| Database | Date last searched | Research syntax | |
| --- | --- | --- | --- |
| MEDLINE (via pubmed interface)  Hits: 800 | 18/04/2023 | 1 | "Lung Neoplasms"[Mesh] OR “Lung neoplasm*”[tiab] OR “lung cancer”[tiab] OR “lung tumor*”[tiab] OR “lung tumour*”[tiab] OR “lung carcinoma*”[tiab] OR “lung malignanc*”[tiab] |
|  |  | 2 | "Fatigue"[Mesh] OR "Asthenia"[Mesh] OR “fatigue”[tiab] OR “asthenia”[tiab] OR “Tired*”[tiab] OR “lack of energy”[tiab] OR “Weary”[tiab] OR “Weariness”[tiab] OR “Weak*”[tiab] |
|  |  | 3 | "Dyspnea"[Mesh] OR “dyspnea”[tiab] OR “dyspnoea”[tiab] OR “Short of breath”[tiab] OR “Shortness of breath”[tiab] OR “Breathless*”[tiab] OR “Breath shortness*”[tiab] |
|  |  | 4 | "Physical Fitness"[Mesh] OR "Activities of Daily Living"[Mesh] OR “physical function*”[tiab] OR “physical fitness”[tiab] OR “activities of daily living”[tiab] OR “ADL”[tiab] OR “physical wellbeing”[tiab] OR “physical well-being”[tiab] OR “physical condition”[tiab] OR “physical activit*”[tiab] |
|  |  | 5 | “Role function*”[tiab] |
|  |  | 6 | "Randomized Controlled Trial"[Publication Type] OR "Randomized Controlled Trials as Topic"[Mesh] OR “randomized controlled trial*”[tiab] OR “randomised controlled trial*”[tiab] OR “RCT”[tiab] OR “randomized controlled stud*”[tiab] OR “randomised controlled stud*”[tiab] |
|  |  | 7 | #2 OR #3 OR #4 OR #5 |
|  |  | 8 | #1 AND #6 AND #7 |

| Database | Date last searched | Research syntax | |
| --- | --- | --- | --- |
| Cochrane  Hits= 1357 | 18/04/2023 | 1 | [mh "Lung Neoplasms"] OR (“Lung neoplasm*”):ti,ab,kw  OR (“lung cancer”):ti,ab,kw OR (“lung tumor*”):ti,ab,kw OR (“lung tumour*”):ti,ab,kw OR (“lung carcinoma*”):ti,ab,kw OR (“lung malignanc*”):ti,ab,kw |
|  |  | 2 | [mh "Fatigue"] OR [mh "Asthenia"] OR (“fatigue”):ti,ab,kw OR (“asthenia”):ti,ab,kw OR (“Tired*”):ti,ab,kw OR (“lack of energy”):ti,ab,kw OR (“Weary”):ti,ab,kw OR (“Weariness”):ti,ab,kw OR (“Weak*”):ti,ab,kw |
|  |  | 3 | [mh "Dyspnea"] OR (“dyspnea”):ti,ab,kw OR (“dyspnoea”):ti,ab,kw OR (“Short of breath”):ti,ab,kw OR (“Shortness of breath”):ti,ab,kw OR (“Breathless*”):ti,ab,kw OR (“Breath shortness*”):ti,ab,kw |
|  |  | 4 | [mh "Physical Fitness"] OR [mh "Activities of Daily Living"] OR (“physical function*”):ti,ab,kw OR (“physical fitness”):ti,ab,kw OR (“activities of daily living”):ti,ab,kw OR (“ADL”):ti,ab,kw OR (“physical wellbeing”):ti,ab,kw OR (“physical well-being”):ti,ab,kw OR (“physical condition”):ti,ab,kw OR (“physical activit*”):ti,ab,kw |
|  |  | 5 | (“Role function*”):ti,ab,kw |
|  |  | 6 | [mh "Randomized Controlled Trial"] OR [mh "Randomized Controlled Trials as Topic"] OR (“randomized controlled trial*”):ti,ab,kw OR (“randomised controlled trial*”):ti,ab,kw OR (“RCT”):ti,ab,kw OR (“randomized controlled stud*”):ti,ab,kw OR (“randomised controlled stud*”):ti,ab,kw |
|  |  | 7 | #2 OR #3 OR #4 OR #5 |
|  |  | 8 | #1 AND #6 AND #7 |

| Database | Date last searched | Research syntax | |
| --- | --- | --- | --- |
| Embase  Hits=2734 | 18/04/2023 | 1 | 'lung cancer'/exp OR 'lung carcinoma'/exp OR 'lung tumor'/exp OR ‘Lung neoplasm*’:ti,ab  OR ‘lung cancer’:ti,ab OR ‘lung tumor*’:ti,ab OR ‘lung tumour*’:ti,ab OR ‘lung carcinoma*’:ti,ab OR ‘lung malignanc*’:ti,ab |
|  |  | 2 | 'fatigue'/exp OR 'lack of energy'/exp OR 'weakness'/exp OR 'asthenia'/exp OR ‘fatigue’:ti,ab OR ‘asthenia’:ti,ab OR ‘Tired*’:ti,ab OR ‘lack of energy’:ti,ab OR ‘Weary’:ti,ab OR ‘Weariness’:ti,ab OR ‘Weak*’:ti,ab |
|  |  | 3 | 'dyspnea'/exp OR ‘dyspnea’:ti,ab OR ‘dyspnoea’:ti,ab OR ‘Short of breath’:ti,ab OR ‘Shortness of breath’:ti,ab OR ‘Breathless*’:ti,ab OR ‘Breath shortness*’:ti,ab |
|  |  | 4 | 'physical functioning'/exp OR 'physical well-being'/exp OR 'daily life activity'/exp OR 'physical condition'/exp OR 'physical activity'/exp OR 'fitness'/exp OR ‘physical function*’:ti,ab OR ‘physical fitness’:ti,ab OR ‘activities of daily living’:ti,ab OR ‘ADL’:ti,ab OR ‘physical wellbeing’:ti,ab OR ‘physical well-being’:ti,ab OR ‘physical condition’:ti,ab OR ‘physical activit*’:ti,ab |
|  |  | 5 | 'role functioning'/exp OR ‘role function*’:ti,ab |
|  |  | 6 | 'randomized controlled trial'/exp OR ‘randomized controlled trial*’:ti,ab OR ‘randomised controlled trial*’:ti,ab OR ‘RCT’:ti,ab OR ‘randomized controlled stud*’:ti,ab OR ‘randomised controlled stud*’:ti,ab |
|  |  | 7 | #2 OR #3 OR #4 OR #5 |
|  |  | 8 | #1 AND #6 AND #7 |

| Database | Date last searched | Research syntax | |
| --- | --- | --- | --- |
| Web of Science  Hits = 484 | 18/04/2023 | 1 | TS=(“Lung neoplasm*”) OR TS=(“lung cancer”) OR TS=(“lung tumor*”) OR TS=(“lung tumour*”) OR TS=(“lung carcinoma”) OR TS=(“lung malignanc*”) |
|  |  | 2 | TS=(“fatigue”) OR TS=(“asthenia”) OR TS=(“Tired*”) OR TS=(“lack of energy”) OR TS=(“Weary”) OR TS=(“Weariness”) OR TS=(“Weak*”) |
|  |  | 3 | TS=(“dyspnea”) OR ‘TS=(“dyspnoea”) OR TS=(“Short of breath”) OR TS=(“Shortness of breath”) OR TS=(“Breathless*”) OR TS=(“Breath shortness*”) |
|  |  | 4 | TS=(“physical function*”) OR TS=(“physical fitness”) OR TS=(“activities of daily living”) OR TS=(“ADL”) OR TS=(“physical wellbeing”) OR TS=(“physical well-being”) OR TS=(“physical condition”) OR TS=(“physical activit*”) |
|  |  | 5 | TS=(“role function*”) |
|  |  | 6 | TS=(“randomized controlled trial*”) OR TS=(“randomised controlled trial*”) OR TS=(“RCT”) OR TS=(“randomized controlled stud*”) OR TS=(“randomised controlled stud*”) |
|  |  | 7 | #2 OR #3 OR #4 OR #5 |
|  |  | 8 | #1 AND #6 AND #7 |
