# Supplementary material for: Nonpharmacological Interventions for Managing the Dyspnea-Fatigue-Physical/Role Functioning Symptom Cluster in Lung Cancer Patients: A Systematic Review
Source: Hindawi journal article supplement (doi:10.1155/2024/9361352), 2024-04-12
Supplement: f1 [file 9361352.f1.zip › Supplementary_file_2_-_study_characteristics_-_all_included.docx]

| **Study author, year, country** | **N total (start)** | **Population** | | | | **Type of intervention** | **Outcome(s)** | **Outcome measurement instrument (Patient (PR) /researcher reported (RR), validated (Y/N/NR))** | **Time-points measured** |
| --- | --- | --- | --- | --- | --- | --- | --- | --- | --- |
| **Cancer stage** | **Treatment** | **Age (mean year)** | **Sex (% male)** |
| Ahmedzai et al. 2004, UK | 12 | Stage I: n = 9  Stage II: n = 2  Stage III: n = 1 | NR | 68  (72,5 median) | 58,33 | Other intervention:  Heliox28 gas mixture (72% He, 28% O2) | Distance walked | 6MWT while breathing test gas mixtures (RR, Y) | Three times between VAS and Borg scale measurement with minimum 15-min rest in between |
| General extent of their dyspnea at rest and on exertion | Visual analogue scale (PR, Y), | Before 6MWT, immediately after 6MWT |
| The modified Borg scale (RR, Y) |
| Arbane et al., 2011, UK | 53 | Stage I: n = 25  Stage II: n = 12  Stage III: n = 7 | Lung resection | 64 | 52,83 | Exercise intervention | Quadriceps muscle strength | Magnetic stimulation (RR, NR) | Pre-op (T0), day 5 postop (T1), and week 12 postop (T2) |
| 6 Minute Walk distance | 6 Minute Walking Test (6MWT) (RR, Y) |
| Arbane et al., 2014, UK | 131 | Stage I: n = 53  Stage II: n = 24  Stage III: n =14  Stage IV: n = 9  Unknown: n = 21 | Surgery | 68 | 54,5 | Exercise intervention | Physical activity | Respironics Actiwatch® and Sleep Analysis Software (RR, NR) | Pre-op (T0), 5 days post-op (T1), 4 weeks post-op (T2) |
| 63 (subgroup airflow obstruction) | NR | 69 | 70 | Exercise tolerance | Incremental Shuttle Walk Distance (ISWT) (RR, Y) | Pre-op (T0), 5 days post-op (T1), 4 weeks post-op (T2) |
| Quadriceps muscle strength | The Strainstall ‘Junior Load Cell’ or Omega LCM101-250 (RR, NR) | Pre-op (T0), 5 days post-op (T1), 4 weeks post-op (T2) |
| Physical functioning | SF-36 (PR, Y) | Baseline (T0) and 4 weeks post-op (T1) |
| Role functioning |
| Fatigue | EORTC QLQ-LC13 (PR,Y) |
| Bade et al., 2021, USA | 40 | Stage IIIA: n = 5  Stage IIIB: n = 6  Stage IV: n = 29 | Mixed:  Receiving treatment: n = 34  Chemotherapy only: n = 4  Chemo-immunotherapy:  n = 6  Immunotherapy only: n = 14  Targeted therapy:  n = 10  Post-treatment:  n = 6 | 64,88 | 25 | Multicomponent intervention:  Exercise intervention + psychoeducational intervention | Physical activity | The Modifiable Activity Questionnaire (PR, Y) | Baseline and follow-up (week 12) |
| Role functioning | EORTC-QLQ-C30 (PR, Y) |
| Physical functioning |
| Fatigue |
| Dyspnea | MMRC Dyspnea scale (PR, Y)  And  EORTC-QLQ-C30 (PR, Y) |
| Bhatia et al, 2019, Switzerland | 151 | Stage IIIA or less | No surgery yet | 64 | 60 | Exercise intervention | Walking distance | 6MWT (RR, Y) | Before and after training |
| Bredin et al, 1999, UK | 103 | NR | NR | NR | NR | Multicomponent intervention: Exercise intervention + psychoeducational intervention | Breathlessness at worst | VAS (PR, Y) | Week 1, week 4, and week 8 |
| Breathlessness at best |
| Brocki et al, 2014, Denmark and Sweden | 78 | Stage I: n =26  Stage II: n =31  Stage III: n =11  Adjuvant treatment: n =34 | Surgery | 64,5 | 59,5 | Exercise intervention | Physical functioning | SF-36 v2 (PR, Y) | Week 3 postop (baseline), 4 months postop, 12 months postop |
| Role functioning |
| Functional exercise capability | 6MWT (RR, Y) |
| Dyspnea | Borg scale (PR, Y) | Post 6MWT |
| Brocki et al, 2015, Denmark, Sweden, and Belgium | 68 | NR | Surgery | 70 | 57,5 | Exercise intervention | Physical/functional performance | 6MWT (RR, Y) | Day pre-op (baseline), 3-5 days post-op (POD5) and 2 weeks post-op |
| Experienced dyspnea | Borg CR10 scale (PR, Y) | Before and after the 6MWT |
| Brocki et al, 2018, Denmark and Sweden | 68 | Early-stage | Surgery | 70 | 57,5 | Exercise intervention | Physical activity | Physical Activity Scale 2.1 questionnaire (PR, NR) | Day before surgery (T0) and 2 weeks postop (T1) |
| Carlson et al, 2013, Canada | 549 | Early-stage: n =152  Late-stage: n =359 | Mixed:  Surgery: n=36  Chemotherapy: n=10  Radiation therapy: n=6  Hormone therapy: n=2  No interventions: n=495 | 63 | 54,7 | Psychoeducational intervention | Fatigue | Patients were also asked to ‘rate your average fatigue during the past week’ (PR, N) | Baseline, at 3 months |
| Breathlessness | Physical problem score (range 0-3) (PR, N) |
| Cavalheri et al, 2016, Australia | 17 | Stage I: n=14  Stage II: n=2  Stage IIIA: n=1 | Mixed:  Open surgery: n=8  VATS surgery: n=9  Adjuvant chemotherapy: n=2 | 67 | 29 | Exercise intervention | 6- minute walk distance (m) | 6MWT (RR, Y) | Baseline, post-intervention |
| Sedentary behavior (%) | The SenseWear armband (RR, NR) |
| Fatigue | Borg scale 6MWT (PR, Y) |
| Dyspnea |
| Physical functioning | SF-36 (PR, Y) |
| Role physical | SF-36 (PR, Y) |
| Chan et al, 2011, UK and Hong Kong | 140 | Stage III or IV | Palliative radiotherapy | NR | 83 | Psychoeducational intervention | Intensity of breathlessness | Visual analogue scale (VAS) (PR, Y) | Baseline (T0), at week 3 (T1), at week 6 (T2), and at week 12 (T3) |
| Intensity of fatigue | The revised Piper Fatigue Scale (PR, Y) |
| Lai et al, 2016, China | 60 | Stage I: n=34  Stage II: n=20  Stage III: n=5  Stage IV: n=1 | Surgery:  VATS: n=41  Open: n=19 | 72,05 | 56,65 | Exercise intervention | 6-min walking distance (m) | 6MWT (RR, Y) | Day 1 pre-op and at the end of the 7-days intervention |
| Physical function | EORTC QLQ-C30 (PR, Y) |
| Dyspnea |
| Cheng et al, 2017, China | 28 | Stage I/II: n=10  Stage III/IV: n=18 | Mixed:  Chemotherapy or radiotherapy | 60 (median) | 46,43 | Acupuncture / acupressure intervention | Intensity of cancer-related fatigue (CRF) | Chinese version of the Brief Fatigue Inventory (BFI-C) (PR, Y) | Baseline, at week 2, at week 4, and at week 6 |
| Cheng et al, 2020, China | 58 | NR | Lobectomy | 63.6 | 48,28 | Multicomponent intervention: Exercise intervention + Diet intervention | Exercise Ability | 6MWT (RR, Y) | Before and after treatment |
| Dyspnea | Self-feeling score (PR, N) |
| Cheung et al, 2021, China and Taipei | 30 | IIIB or IV | Mixed:  Targeted therapy: n= 18  Chemotherapy: n=7  Radiotherapy: n=1  No treatment: n=4 | 6,16 | 54,07 | Exercise intervention | Exercise capacity | 6MWT (RR, Y) | Baseline, after 12 weeks, 6 month follow-up, and 1-year follow-up |
| Choratas et al, 2020, Australia | 19 | NR | Chemotherapy | NR | 74 | Psychoeducational intervention | Breathlessness | Modified Borg Scale (PR,Y) | Baseline, at 2 weeks, and at 4 weeks |
| Visual Analog Scale (PR, Y) |
| Corner et al, 1996, UK | 20 | NC | Mixed:  Chemotherapy or radiotherapy | 62 (median) | 61,61 | Multicomponent intervention: Exercise intervention + psychoeducational intervention | Breathlessness at best | VAS (PR, Y) | Baseline, at 4 weeks, and at 12 weeks |
| Breathlessness at worst |
| Dhillon et al, 2017, Australia, USA, The Netherlands, Camperdown, Randwick, Concord, and Sydney. | 111 | Stage III/IV | Mixed:  Not on active treatment: n=24  On chemotherapy only: n=50  Combination chemotherapy + targeted agent: n=6  Targeted agent alone: n=31 | 64 (median) | 55 | Multicomponent intervention: Exercise intervention + Psychoeducational intervention | Fatigue | 13-item Functional Assessment of Cancer Therapy-Fatigue (FACT-F) subscale (PR, Y) | Baseline, at 2 months, at 4 months, and at 6 months |
| Dyspnea | Shortness of Breath Questionnaire (PR,Y) |
| 6-min walking distance (m) | 6MWT (RR, Y) |
| Physical functioning | EORTC-QLQ-C30 (PR, Y) |
| Role functioning |
| Physical activity | Active Australia questionnaire (PR, N) |
| Dogan, 2020, Turkey | 60 | Stage II: n=2  Stage III: n=20  Stage IV: n=38 | Chemotherapy | 61,05 | 88,1 | Acupuncture / acupressure intervention | Walking distance | 6MWT (RR,Y) | Baseline, postintervention |
| Dyspnea | Borg Scale (PR, Y) | Baseline, postintervention |
| Edbrooke et al, 2019, Australia | 92 | Stage I: n= 3  Stage IIIA: n=24  Stage IIIB: n=11  Stage IV: n=48  Recurrent: n=6 | Mixed:  Radical chemoradiation: n=33  Palliative chemotherapy: n= 16 Palliative chemotherapy and radiotherapy: n=14  Targeted therapy: n=9  Systemic clinical trial treatment: n=5  Radical radiotherapy: n=4  Stereotactic radiotherapy: n=4  Palliative radiotherapy: n=5  Palliative radiotherapy and  targeted therapy: n=1  Induction chemotherapy and surgical resection: n=1 | 63.5 | 55 | Multicomponent intervention: Exercise intervention + psychoeducational intervention | Functional exercise capacity (6MWD | 6MWT (RR, Y) | Baseline, week 9, and at 6 months |
| Physical activity | International Physical Activity Questionnaire (PR, Y) |
| Edvarsen et al., 2014, Norway | 61 | Stage I: n=33  Stage II: n=19  Stage III: n=10  Stage IV: n=1 | Mixed:  Surgery  Additional chemotherapy after surgery: n=18  Additional radiotherapy after surgery: n=7 | 65,15 | 45,5 | Exercise intervention | Concentric leg strength | Sum of maximum weight that could be lifted once using a horizontal hip and knee extension movement (RR, NR) | Before surgery (T0), 4-6 weeks after surgery (T1), and immediately after 20-week intervention (T2) |
| Maximum hand strength | Grip strength dynamometer (RR, Y) |
| Physical functioning | Chair stand test (RR, Y), maximum stair steps for 15 s (RR, Y), a modified one-foot static balance test on soft ground for a maximum of 60 s (RR, Y), and SF-36 (PR, Y) |
| Dyspnea | EORTC QLQ-C30 (PR, Y) |
| Egegaard et al., 2019, Denmark | 15 | Stage IIIa: n=5  Stage IIIb: n=8  Stage IV: n=2 | Mixed  Chemoradiotherapy | 64,5 | 33,05 | Exercise intervention | 6MWD (m) | 6MWT (RR, Y) | Baseline (T0), after 7 weeks (T1) |
| Steps (day) | Garmin® vívosmart® HR activity tracker (RR, Y) |
| Functional well-being | FACT-L (PR, Y) |
| Fernandez-Rodriguez et al., 2019, Spain and Chile | 90 | Stage IIIa:  CG:33%  IG: 28,9%  Stage IIIb:  CG: 33%  IG: 32,4%  Stage IV:  CG: 30%  IG:32% | Chemotherapy | IG: 61,87 (median)  CG: 60,92 (median) | 82 | Psychoeducational intervention | Physical functioning | EORTC QLQ-C30 (PR, Y) | 1st session (T1), 2nd session (T2), 3rd session (T3), 4th session (T4), 5th session (T5) 1st follow-up (T6), 2nd follow-up (T7), and 3rd follow-up (T8) |
| Role functioning |
| Fatigue |
| Dyspnea |
| Gioxari et al., 2021, Greece | 30 | Stage III: n=5  Stage IV: n=25 | Mixed:  Surgery (>3months): n= 7  Unoperated: n=23  Combined chemo-radiotherapy: n= 12  Chemotherapy: n=3  Immunotherapy: n=4  Combined chemo-immunotherapy: n=3  Molecular therapy: n=1 | 52,2 | 53,33 | Diet intervention | Physical activity intensity (METS – min/week) | The International Physical Activity Questionnaire (PR, Y) | Baseline (T0), and 3 months follow-up (T1) |
| Granger et al., 2013, Australia | 15 | Stage I: n=3  Stage II: n=2  Stage III: n=3  Stage IV: n=2  No malignancy: n=5 | Surgery | 65,5 | 53 | Exercise intervention | 6MWD | 6MWT (RR, Y) | Baseline (T0), 2 weeks post-op (T1), and 12 weeks post-op (T2) |
| Functional mobility | TUG (RR, Y) |
| Physical functioning | EORTC-QLQ-C30-L13 (PR, Y) |
| Role functioning |
| Fatigue |
| Dyspnea |
| Physical function | SF-36 (PR, Y) |
| Role physical |
| Gunes et al., 2020, Turkey | 60 | NR | Chemotherapy | 60,25 | 91,65 | Multicomponent intervention: Exercise intervention + psychoeducational intervention | Physical functioning | Functional Living Index-Cancer (FLIC) (PR, Y) | Pre-test and post-test |
| Henke et al., 2014, Norway and Germany | 29 | Stage IIIa / IIIb / IV | Palliative chemotherapy | NR | NR | Exercise intervention | Functional capacity | 6MWT (RR, Y) | Baseline (T0) and after chemotherapy (T1)  Baseline (T0) and after chemotherapy (T1) |
| Staircase walking (amount of steps) (RR, Y) |
| Muscle strength (max. amount of rep.) | Biceps curl (RR, NR) |
| Triceps extension (RR, NR) |
| Bridging (RR, NR) |
| Abdominal exercise (RR, NR) |
| Physical functioning | EORTC QLQ-C30 (PR, Y) |
| Role functioning |
| Fatigue |
| Dyspnea | EORTC QLQ-C30 (PR, Y) |
| EORTC QLQ-LC-13 (PR, Y) |
| Patient’s independence in activities of daily living | Barthel Index |
| Hoffman et al., 2016, US | 73 | Stage I: 62%  Stage II: 21%  Stage III: 11%  Stage IV: 3%  Indeterminate: 3% | Surgery | 66,5 | 44,5 | Multicomponent intervention: exercise intervention +  Psychoeducational intervention | Cancer-related fatigue (CRF) | The 9-item Brief Fatigue Inventory (BFI) (PR, Y) | Presurgery and postsurgery (week 1, week 2, week 3, week 4, week 5, and week 6) |
| Functional status or fatigability | 6MWT (RR, Y) | Presurgery and postsurgery (week 3 and week 6) |
| Functional performance (physical health component) | The modified Borg Scale (PR, Y) |
| Hou et al., 2017, China | 162 | Stage I-III: n= 150  Stage IV: n= 12 | Gemcitabine combined with platinum-based drugs (GP chemotherapy) | 56,92 | 75,07 | Acupuncture / acupressure intervention | Fatigue | The Revised Piper Fatigue Scale (RPFS) (PR, Y) | Before chemotherapy (P1), day 8 after chemotherapy (P2), and day 28 after chemotherapy (P3) |
| Huang et al., 2017, Taiwan | 55 | Stage IIIa: n=1  Stage IIIb: n=8  Stage IV: n=44 | Chemotherapy | 59,84 | 58 | Psychoeducational intervention | Physical functioning | EORTC QLQ-C30 (PR, Y) | Before chemotherapy (T0), 1 month after beginning chemotherapy (T1), 2 months after the intervention (T2), and 3 months after the intervention (T3) |
| Role functioning |
| Huang et al., 2018, China | 28 | In situ: n=2  Stage I: n=6  Stage II: n=8  Stage III: n=7 | Surgery | 59,01 | 44,25 | Psychoeducational intervention | Exercise capacity | 6MWT (RR, Y) | Baseline (T0) and after intervention (T1) |
| Hwang et al., 2012, Taiwan | 24 | Stage IIIa: n=2  Stage IIIb: n=2  Stage IV: n=20 | Targeted therapy:  Iressa: n=8  Tarceva: n=11  Afatinib: n=5 | 59,75 | 51,05 | Exercise intervention | Physical functioning | EORTC QLQ-C30 (PR, Y) | Baseline (T0) and follow-up (T1) |
| Role functioning |
| Dyspnea |
| Fatigue | Combination EORTC QLQ-C30 and EORTC QLQ-LC13 (PR, Y) |
| Jastrzebski et al., 2015, Poland | 20 | Stage III / IV | Chemotherapy | IG: 59  CG: NR | IG: 83,33  CG: NR | Exercise intervention | Dyspnea | Modified dyspnea scale of the Medical Research Council (MRC) (PR, Y) | Pre and post intervention |
| Exercise capacity (6MWD in m) | 6MWT (RR, Y) |
| Physical functioning | SF-36 (PR, Y) |
| Role functioning | SF-36 (PR, Y) |
| Jiang et al., 2017, China and Korea | 60 | Stage III: n=42  Stage IV: n=18 | Chemotherapy | 58,62 | 70 | Diet intervention | Fatigue | Fatigue symptom inventory (FSI) (PR, Y) | Pre- and post-treatment |
| Shortness of breath | CM symptoms questionnaire (PR, NR) |
| Functional status | FACT-L scale (PR, Y) |
| Jiang et al., 2021, China | 64 | NR | Surgery | 77,24 | 54,605 | Other intervention: Continuous positive airway pressure treatment (CPAP) | Dyspnea | NR | After 1 month |
| Johnson et al., 2015, UK | 156 | NR | NR | 69 | 60 | Multicomponent intervention: Exercise intervention + psychoeducational intervention | Dyspnea | Chronic Respiratory Questionnaire (PR, N) | Baseline, week 4, and week 8 |
| Johnson et al., 2019, Sweden | 107 | NR | Elective thoracic surgery | 68,55 | 43,85 | Exercise intervention | Physical capacity (6MWD) | 6MWT (RR, Y) | Preoperatively and 3 months postoperatively |
| Subjectively reported physical activity | The International Physical Activity Questionnaire Modified for the Elderly (IPAQ-E, Y) (PR, Y) |
| Objectively measured physical activity | Accelerometer (ActiGraph, model GT3X+) (RR,Y) | During hospital stay after surgery, starting from the morning of the day1 postoperatively, and during 1 3 months postoperatively |
| Dyspnea | The Modified Medical Research Council Dyspnea Scale (PR,Y) | Baseline and 3 months postoperatively |
| Johnson et al., 2019b, Sweden | 94 | NR | Elective thoracic surgery | 68,5 | 47,5 | Exercise intervention | Objective physical activity | Accelerometer (ActiGraph, model GT3X+) (RR,Y) | During hospital stay after surgery, starting from the morning of the day1 postoperatively, and during 1 3 months postoperatively |
| Physical activity (6MWD) | 6MWT (RR,Y) | Baseline (T0) and postoperative (T1) |
| Dyspnea | The Modified Medical Research Council Dyspnea Scale (M-MRC) (PR,Y) |
| Kiss et al., 2016, Australia | 24 | Stage IIa: n=2  Stage IIb: n=1  Stage IIIa: n=14  Stage IIIb: n=4  Limited: n=3 | Mixed:  (Chemo)Radiotherapy | 63,45 | 50 | Diet intervention | Fatigue | FACT-L (PWB domain) (PR, Y) | Baseline (T1), week 1 RT (T2), end of RT (T3), 4 weeks post-RT (T4), and 3 months post-RT (T5) |
| Functional status |
| Krug et al., 2021, Germany | 171 | Stage IV | NR | 66,25 | 55,4 | Psychoeducational intervention | Functional wellbeing | FACT-L (PR, Y) | Baseline, 3 months, 6 months and 9 months (instead of 12 months) |
| Lau et al., 2020, Hong Kong | 157 | Stage I: n = 4  Stage II:  n = 10  Stage III:  n = 31  Stage IV:  n = 100 | NR | 60 | 39,9 | Multicomponent intervention: Exercise intervention + psychoeducation + acupressure / acupuncture | Functional  wellbeing | FACT-G (PR, Y) | Baseline (= 1 week before intervention = T0), and 1 week (T1), 8 weeks (T2), 16 weeks post-intervention (T3) |
| Li et al., 2019, China | 159 | Stage IIIB:  n = 37  Stage IV:  n = 101 | Icotinib hydrochloride | 55.5 | 29,75 | Psychoeducational intervention | Patient (QOL)  functional wellbeing | FACT-L (PR, Y) | Baseline and after  8 weeks |
| Li et al., 2022, China | 40 | Stage III: 4  Stage IV: 36 | Chemo: n=15  Surgery and chemo: n=2  Chemo and radio: n=1  Chemo and targeted therapy: n=5  Chemo and immuno: n = 11  Surgery, chemo, and targeted therapy n=2 Surgery, chemo, and immuno: n=1 Chemo, radio, and immuno: n=2 Chemo, radio, and targeted therapy: n=1 | 56.9 | 72,5 | Psychoeducational intervention | Fatigue interference | 13-item FSI (FSI-I subscale) (Y) | Baseline assessment and one week post-intervention |
| HRQoL | Fact-L (Y) |
| CRF | The multi-dimensional Fatigue inventory (MFI) (Y) |
| Depressive symptoms | The patient Health Questionnaire (PHQ-9) (Y) |
| Anxiety | Generalized Anxiety Disorder Scale (GAD-7) (Y) |
| Cancer-specific distress | Impact of Events Scale-Revised (IES-R) (Y) |
| Licker et al., 2016, Switzerland | 151 | Stage I: n = 73  Stage II:  n = 55  Stage III:  n = 23 | Surgical lung resection | 64 | 60 | Exercise intervention | 6-min walking distance (m) | 6MWT (RR, Y) | Before and after intervention |
| Lin et al, 2019, China | 100 | Stage I: n=0  Stage II: n=17  Stage III: n= 34  Stage IV: n=49 | Chemotherapy | 61,2 | 58,9 | Acupuncture / acupressure intervention | Physical fatigue | CFS-C (RR, Y) | Baseline and after the intervention (after the patients received 3 cycles of chemotherapy) |
| Affective fatigue |
| Cognitive fatigue |
| Liu et al, 2020, China | 85 | Stage I – II: n= 65  Stage III: n= 8 | Lobectomy | 56,2 | 31,5 | Multicomponent intervention: Exercise intervention + Psychoeducational intervention + Diet intervention | Perioperative functional capacity | 6MWT (RR, Y) | Baseline, 1 day before surgery, and 30 days after surgery |
| Maddocks et al, 2009, UK | 16 | Stage III: n=5  Stage IV: n= 11 | Mixed:  Surgery  Chemotherapy  Radiation therapy | 60 | 56,2 | Other intervention: Neuromuscular electrical stimulation | Quadriceps Muscle Strength | Cybex NORM dynamometer (RR, NR) | Over a period of 5 weeks |
| Exercise Endurance | ESWT (RR, NR) |
| Free-Living Physical Activity | ActivPAL monitor (PR, NR) |
| Maddocks et al, 2013, UK | 49 | Stage IV | Chemotherapy:  carboplatin + vinorelbine: n= 25  carboplatin + pemetrexed: n= 20  Cisplatin: n= 3  cisplatin + pemetrexed: n= 1 | 69 | 57,1 | Other intervention: Neuromuscular electrical stimulation | Physical activity | ActivPal accelerometer (PR, NR) | Baseline (T0), end of treatment at week 9 or 12, follow-up at week 17 or 20 |
| General fatigue | FACT-F (RR, Y) |
| Physical functioning | EORTC QLQ-C30 (RR, Y) |
| Role functioning | EORTC QLQ-C30 (RR, Y) |
| Molassiotis et al, 2014, Hong kong, UK, Cyprus | 47 | Stage I: n= 3  Stage II: n=8  Stage III: n= 14  Stage IV: n= 13  Unknown: n=8 | Mixed:  Chemotherapy and/or radiotherapy and/or surgery | 69,5 | 80,4 | Exercise intervention | Dyspnea | mBorg scale (PR, Y) | Baseline (T0), week 4 (T1), week 8 (T2), week 12 (T3) |
| The Chronic Respiratory Disease Questionnaire-short form (CRDQ) (PR, Y) |
| Worst breathlessness | Numerical rating scale (PR, Y) |
| Average breathlessness |
| Fatigue | The Chronic Respiratory Disease Questionnaire-short form (CRDQ) (PR, Y) |
| Molassiotis et al, 2021 | 156 | Stage I: n=4  Stage II: n=10  Stage III: n=46  Stage IV: n=96 | Mixed:  Chemotherapy: n=64  Chemotherapy and radiotherapy: n=60  Chemotherapy and operation: n=32 | 56.84 | 74,4 | Multicomponent intervention: Exercise intervention + psychoeducational intervention | Dyspnea | CDS (PR, Y) | Baseline, at 6 weeks, end at 12 weeks |
| Fatigue | FACT-F (PR, Y) |
| Moore et al, 2002, UK | 203 | Stage: I/II: n=26  Stage: IIIa: n=21 Stage: IIIb: n=64 Stage: IV: n=38 None (small cell):  n=35  Mesothelioma: n=14  Not known: n=4 | Mixed:  Radiotherapy,  Chemotherapy, or  surgery | 67 | 69,5 | Nurse-led follow-up | Fatigue | EORTC (PR, Y) | Baseline, at three months, at six months, and at 12 months |
| Dyspnea |
| Physical functioning |
| Role functioning |
| Morano et al, 2013, Brazil and Spain | 24 | Stage I/II: n=20  Stage IIIA: n=4 | Lung resection | 66.80 | 37,45 | Multicomponent intervention: exercise intervention + psychoeducational intervention | 6MWD | 6MWT  (RR, Y)) | Baseline,  1 month |
| Mosher et al, 2016, USA | 106 | Stage I: n=18  Stage II: n=14  Stage III: n=18  Stage IV: n=43  SCLS Limited stage: n=4  SCLC Extensive stage: n=9 | Mixed:  Chemotherapy:  n= 61  Radiation:  n= 28  Chemoradiation:  n= 23  Surgery:  n= 47 | 62.72 | 47,10 | Psychoeducational intervention | Fatigue | SF-36 (PR, Y) | Baseline,  2 weeks post intervention,  6 weeks post intervention |
| Breathlessness | Memorial Symptom Assessment Scale (PR, Y) |
| Mosher et al, 2019, USA | 50 | Stage III: n=14  Stage IV: n=34  SCLC Extensive Stage: n=2 | Mixed  Chemotherapy:  n= 31  Radiation:  n= 18  Chemoradiation: n=15  Surgery to remove primary tumor:  n= 12  Surgery to remove metastases:  n=3 | 62.6 | 56 | Psychoeducational intervention | Fatigue | Fatigue symptom inventory (PR, Y) | Baseline, 2 weeks post intervention, 6 weeks postintervention |
| Breathlesness | Four item PROMIS Scale (PR, NR) |
| Memorial Symptom Assessment Scale (PR, Y) |
| Ning et al., 2021, China | 102 | Stage III: n=37  Stage IV: n=58 | Chemotherapy | 62.5 | 81,1 | Psychoeducational intervention | Fatigue | CFS (PR, NR) | Before chemotherapy,  end of cycle 2,  end of cycle 4 |
| Peng et al., 2019, China | 160 | Stage III/ IV | Surgery (GKS) | 60.4 | 53,15 | Psychoeducational intervention | Fatigue | EORTC QLQ-C30 (PR, Y) | Before and after treatment, 3-months follow up |
| Dyspnea |
| Porter et al., 2011, USA | 233 | Non-small-cell Stage I: n=122  Non-small-cell Stage II: n=37  Non-small-cell Stage III: n=60  Small-cell limited stage: n=10 | Mixed:  Surgery: n=187.57  Chemotherapy: n= 92.04  Radiotherapy: n=61.05 | 65.3 | 52,8 | Psychoeducational intervention | Physical well-being (QoL) | FACT-L (RR, Y) | Baseline, post-test, and four- month follow-up |
| Functional well-being (Qol) |
| Quist et al., 2018, Denmark | 235 | Stage IA: n=51  Stage IB: n=70  Stage IIA: n=24  Stage IIB: n=28  Stage IIIA: n=35  Stage IIIB: n=3 | Surgery | 65.5 | 45 | Multicomponent intervention: Exercise intervention + Psychoeducational intervention | Role functioning | EORTC QLQ-C30 (PR, Y) | Baseline, after 14 weeks, 26 weeks, 52 weeks |
| Physical functioning |
| Fatigue |
| Dyspnea |
| Exercise performance (6MWD) | 6MWT (RR, Y) |
| Rotolo et al., 2019, Italy | 50 | NR | Lobectomy | 67.15 | 67,5 | Exercise intervention | Dyspnea | Borg Scale (PR, Y) | Postoperative day 1, 4 and 7 |
| Rutkowska et al., 2019, Poland and VS | 40 | Stage IIIB: 24  Stage IV: 6 | Chemotherapy | 60,23 | NR | Exercise intervention | Dyspnea | Modified Medical Research council (mMRC) questionnaire (PR, Y) | Baseline (day 1) and day 42 |
| Basline Dyspnea Index (PR, NR) |
| Borg dyspnea scale (PR, NR) |
| Exercise performance | 6MWT (RR, Y) |
| Functional fitness | Arm curl, chair stand, chair sit and reach, up and go, back scratch (RR, NR) |
| Rutkowska et al., 2021, Poland | 40 | Stage IIIB: 20  Stage IV: 6 | Chemotherapy | 61,3 | 94,5 | Exercise intervention | Functional wellbeing | FACT-L (PR, Y) | Baseline (pre) and day 42 (post) |
| Role physical | SF-36 (PR, Y) |
| Physical functioning |
| Sanchez-Lara et al., 2014, Mexico | 92 | Stage III: 20  Stage IV: 72 | Chemotherapy | 59,9 | 46,8 | Diet intervention | Physical functioning | EORTC-QLQ-C30 and QLQ-LC13 (PR, Y) | T0:  no more than 7 days prior to chemotherapy administration  T1:  after the first chemotherapy cycle (+-7 days)  7 days,  T2:  after the second chemotherapy cycle (+-7 days) |
| Fatigue |
| Sebio Garcia et al., 2016, Spain | 40 | Stage I | Lung resection surgery | 70,2 | 10 | Exercise intervention | Exercise capacity | Constant-load Cycle Endurance Test (CCET) (RR, Y) | Baseline (preintervention), postsurgery and 3 months |
| Functional capacity (6MWD in m) | 6MWT (RR, Y) |
| Upper and lower body strength | Arm Curl test (RR, Y) |
| 30’s Chair-to-Stand Test (RR, NR) |
| Physical functioning | SF-36v2 (PR, Y) | Baseline, postintervention |
| Role physical |
| Stefanelli et al., 2013, Italy | 40 | Stage I/II | Lobectomy | 65 | 57,5 | Exercise intervention | Dyspnea | Modified Borg Scale | T0 (baseline), T1, T2 (60 days after lobectomy) |
| Stigt et al., 2013, The Netherlands | 49 | NR | Thoracotomy | 63.4 | 82 | Multicomponent intervention: Exercise intervention + psychoeducational intervention | 6MWD (m) | 6-minute walking distance test (RR, Y) | Baseline and 3 months after discharge |
| Physical functioning | SF-36 (PR, Y) | Before surgery and 1, 3, 6 and 12 months after discharge |
| Role physical |
| Strong et al., 2016, California | 11 | Advanced (end-stage) | NR | NR | NR | Acupuncture/acupressure intervention | Dyspnea | The Cancer Dyspnea Scale (CDS) (PR, Y) | 8 time points: one day 1, once in the morning and once in the evening; twice a day for the next 3 days day 2, 3 & 4) |
| Tan et al., 2019, Malysia | 63 | NR | NR | 63.9 | 58,7 | Exercise intervention | Dyspnea | Modified Borg Dyspnea Scale (PR, Y) | Minute 0 (T0), minute 5 (T5) and minute 20 (T20) |
| Tan et al., 2019b, China | 136 | Stage II: n=5  Stage III: n=38  Stage IV: n=35  Small cell lung cancer: n=16 | Chemotherapy | NR | 69,2 | Psychoeducational intervention | Fatigue | The M.D. Anderson Symptom Inventory (MDASI-C) (PR, NR) | Pre-intervention (T0), 8th week following intervention (T1), 12th week following intervention (T2) |
| Dyspnea |
| Tang et al., 2014, Taiwan | 57 | Stage I: n=4  Stage II: n=2  Stage III: n=13  Stage IV: n=38 | Chemotherapy | 58.27 | 59,3 | Acupuncture/acupressure intervention | Fatigue (total score) | Chinese version of the Tang Fatigue Rating Scale (PR, Y) | Before initial chemotherapy (T0), on day 1 of third chemotherapy (T1), and on day 1 of sixth chemotherapy (T2) |
| Fatigue in daily living activities |
| Physical functioning |
| Tian et al., 2010, China | 70 | Stage IIIb: n=21  Stage IV: n=39 | Chemotherapy | NR | 50 | Diet intervention | Fatigue | EORTC QLQ-C30 (PR, Y) | Before and after receiving the treatment |
| Dyspnea |
| Physical functioning |
| Role functioning |
| Van der meij et al., 2012, The Netherlands | 40 | Stage IIIa: n=16  Stage IIIb: n=24 | Mixed: chemoradiotherapy | 57.8 (median) | 52,5 | Diet intervention | Fatigue | EORTC-QLQ-C30 (PR, Y) | At baseline, after 3 and 5 weeks |
| Dyspnea |
| Physical function |
| Role function |
| Daily physical activity score | Physical activity monitor (PAM) accelerometer (RR, Y) |
| Low-intensity physical activity |
| Moderaite-intensity activity |
| Handgrip strength | Hydraulic hand dynamometer (RR, Y) | At baseline and every week for 5 weeks |
| Wang et al., 2020, China | 65 | Carcinoma in situ: n=6  Stage I: n=48  Stage II: n=3  Stage III: n=8 | Surgery | 57  (median) | 33,9 | Exercise intervention | Dyspnea | The modified medical research council (mMRC)  (RR, Y) | At the day of admission (T0), before surgery (T1), the first day after operation (T2) and discharge from hospital (T3) |
| 6MWD | 30-m corridor for 6 minutes according to the American Thoracic Society guidelines (RR, NR) |
| Yang et al., 2018, Singapore and Finland | 69 | Stage III: n=21  Stage IV: n=48 | Mixed:  Chemotherapy: n=37  Radiotherapy: n=5  Targeted therapy: n=19  Immunotherapy: n=2 | 58.8 | 68,2 | Psychoeducational intervention | Functional well-being | Chinese version of FACT-L) (PR, Y) | At baseline and at 12 weeks |
| Physical well-being |
| Yanwei et al., 2018, China | 126 | Stage IV | Icotineb hydrochloride | NR | 38 | Psychoeducational intervention | Physical well-being | FACT-L (PR, Y) | At baseline and at 12 weeks |
| Functional well-being |
| Ye et al., 2021, China | 86 | Advanced | Mixed:  Chemoradiotherapy | 65.2 | 67,5 | Other intervention: Comfort nursing | Activity of daily living | Activity of daily living scale (ADL)  (PR, NR) | Before and after nursing |
| Yorke et al., 2015, UK and China | 107 | NR | NR | 67,7 | 46,5 | Multicomponent intervention: Exercise intervention + Psychoeducational intervention + Acupressure/acupuncture intervention | Fatigue | 13-item Functional Assessment of Cancer Therapy Fatigue (FACIT-F) (PR, NR) | T0: before randomisation,  T1: week 4, end of the follow-up,  T2: week 12, end of study |
| Breathlessness | Dyspnea-12 (RR, NR) |
| Average breathlessness | NRS (PR, Y) |
| Yorke et al., 2022, UK | 263 | Meso-thelioma: n=32  Primary LC: n=230  Secondary LC: n=1 | Palliative: n= 159  Radical: n=104 | 69 | 49,8 | Multicomponent intervention | Dyspnea | Dyspnea-12 (D-12) (Y) | Baseline, 4 weeks and 12 weeks |
| Fatigue | The Functional Assessment of Chronic Illness-Fatigue (NR) |
| Yount et al., 2013, USA | 253 | Stage IIIa: n=31  Stage IIIb: n=53  Stage IV: n=134  Small cell: n=24 | Mixed:  Chemotherapy or oral therapy | 60,6 | 49,4 | Psychoeducational intervention | Physical well-being | FACT-G (PR, Y) | Baseline, week 6 and week 12 |
| Functional well-being |
| Zhang et al., 2015, China | 91 | Stage I: n=3  Stage II: n=8  Stage III: n=21  Stage IV: n=59 | Chemotherapy | 62,8 | 7,47 | Exercise intervention | CRF (total score of the MFSI-SF) | MFSI-SF (PR, Y) | T0: before the first course of chemotherapy  T1: before the third course of chemotherapy  T2: at the end of the fourth course of chemotherapy |
| Dimeo et al., 2004, Germany | 72 | Stage I: n=18  Stage II: n=28  Stage III: n=16  Stage IV: n=7 | Surgery | 57,55 | 73, 95 | Exercise intervention | Dyspnea | EORTC QLQ-C30 version 2 (PR, Y) | Before the programme (T0) and after the programme (T1) |
| Fatigue |
| Physical functioing |
| Role functioning |
| Linn et al., 1982,  Florida | 120 (subsample lung cancer patients: 64) | End stage cancer (clinical stage IV) | Mixed:  Surgery, chemotherapy, radiation or combination | 58 | 100 | Psychoeducational intervention | Functional status | 16-item rapid Disability Rating Scale(RR, Y) | At baseline and follow ups |
| Salhi et al., 2015, Belgium | 121 | Stages I-IV lung cancer, small cell or mesothelioma | Mixed:  Surgery, chemotherapy or radiotherapy | CON: 64 (median)  CRT: 63 (median)  WBVT: 60 (median) | 72,7 | Exercise intervention | Physical functioning | EORTC QLQ-C30 (PR, Y) | Before (T1) and after (T2) radical treatment (within 8 weeks of resection or within 2 weeks after the end of the non-surgical treatment |
| Dyspnea | VAS (PR, Y) |
| Fatigue | FACT-F (PR, Y) |
| 6MWD | 6MWT (RR, Y) |
| Salhi et al., 2014, Belgium | 45 | Stage I – III | Mixed:  Surgery, chemotherapy or radiotherapy | 65 | 82,2 | Exercise intervention | Muscle strength estimated by measuring quadriceps force (QF) | Isometric handheld dynamometer (RR, NR) | Before (M1) and after (M2) radical treatment and at the earliest 12 weeks after randomization (M3) |
| Schofield et al., 2013, Australia | 108 | NR | Mixed:  Radical: n=44  Palliative radiotherapy: n=40  Palliative chemotherapy: n=24 | 63,05 | 60,3 | Psychoeducational intervention | Physical functioning | EORTC QLQ-C30 (PR, Y) | T1: baseline  T2: 8 weeks post-treatment  T3: 12 weeks post-treatment |
| Role functioning |
| Wangnum et al., 2013, Thailand | 60 | Stage III: n=38  Stage IV: n=52 | Chemotherapy | 56,10 | 68,33 | Psychoeducational intervention | Fatigue | The revised Piper Fatigue Scale (PR, Y) | NR |
| Yates et al., 2020, Australia | 144 | NR | Mixed:  Nil: n=39  Radiotherapy: n=25  Chemotherapy: n=24  Both: n=52 | 67,9 | 63,2 | Multicomponent intervention: Exercise intervention + Psychoeducational intervention | Dyspnea on average | NRS (PR, Y) | Baseline (T1), at 4 weeks (T2), and at 8 weeks (T3) |
| Dyspnea at best |
| Dyspnea at worst |
| Perceived control over dyspnea |
| Functional status | ECOG Performance Rating scale (PR, Y) |
| Sunahara et al., 2023, Japan | 46 | Primary LC: n=31  Lung metastasis: n= 15 | Surgery: n=23  Surgery and chemo: n=23 | 71 | 60,9 | Multicomponent (PE + exercise) | Physical function | Physical component summary, accelerometer (Y) | Baseline and 2 months post-operative |
| Role function | Role/social component summary |
| Dyspnea | Cancer Dyspnea Scale |
| Fatigue | Cancer fatigue scale |
| Scott et al., 2021, USA | 90 | Stage I: n = 58  Stage II; n = 18  Stage III: n = 13  Limited stage: n = 1 | Surgery and adjuvant radiation or chemotherapy | 65 | 33,0 | Exercise intervention | Change in CRF | Symptom limited CPET on electronic cycle ergometer with expired gas analysis (RR, NR) | Pre-randomization, ≤ 14 days after final intervention session (week 17) |
| Electro-cardiogram (RR, NR) |
| Body composition, muscle strength, PR outcomes, tolerability and safety | 1-RM chest press, seated row, leg press (RR, NR) |
| PRO’s |

*PR = participant reported; RR = researcher reported*

*Validation: Y/N/NR = yes / no / not reported*

*Post-op = post-operatively; pre-op = pre-operatively*

*NC = not clear*
