# Supplementary material for: Nonpharmacological Interventions for Managing the Dyspnea-Fatigue-Physical/Role Functioning Symptom Cluster in Lung Cancer Patients: A Systematic Review
Source: Hindawi journal article supplement (doi:10.1155/2024/9361352), 2024-04-12
Supplement: f1 [file 9361352.f1.zip › Supplementary_file_4_-_effects_of_the_intervention_and_risk_of_bias_-_all_included.docx]

| **Study author, year, country** | Outcome | **Outcome measurement instrument** | **Outcome category** | | | | **Group specification** | **Time assessment** | **Effect** | | **MD** | **95% CI** | **P-value** | **RoB assessment**  **(low risk, some concerns, high risk)** |
| --- | --- | --- | --- | --- | --- | --- | --- | --- | --- | --- | --- | --- | --- | --- |
| **PF** | **D** | **F** | **RF** | **Intervention**  **Mean (SD)** | **Control**  **Mean (SD)** |
| Type 1: Exercise intervention | | | | | | | | | | | | | | |
| Arbane et al., 2011, UK | 6 Minute Walk distance (m) | 6MWT | X |  |  |  |  | T0 | 466.6 (102.10) | 455.7 (98.0) | NR | NR | NR | Some concerns |
| T1 | 336.7 (84.1) | 308.7 (124.8) | NR | NR | NR |
| T2 | 480.2 (110.0) | 448.2 (95.1) | NR | NR | NR |
| Change T0-T1 | –131,6 (101.8) | 128.0 (90.7) | NR | NR | NR |
| Change T0-T2 | NR | NR | NR | NR | 0.89 |
| Quadriceps muscle strength | Magnetic stimulation | X |  |  |  |  | T0 | 33.2 (15.2) | 29.1 (10.9) | NR | NR | NR |
| T1 | 37.6 (27.1) | 21.5 (7.7) | NR | NR | NR |
| T2 | 34.2 (9.4) | 26.4 (9.7) | NR | NR | NR |
| Change T0-T1 | 4.0 (21.2) | 8.3 (11.3) | NR | NR | **0.04** |
| Change T0-T2 | NR | NR | NR | NR | NS |
| Arbane et al., 2014, UK | Physical activity: Total 4-week activity count (minutes/day) | Respironics Actiwatch® and Sleep Analysis Software | X |  |  |  | Total group | T2 | 200  (86.7) | 197 (69.5) | NR | NR | 0.46 | Some concerns |
| Subgroup airflow obstruction |  | NR | NR | NR | NR | NR |
| Exercise tolerance (walking distance) | Incremental Shuttle Walk Distance (ISWT) | X |  |  |  | Total group | T2 | NR | NR | NR | NR | NS |
| Subgroup airflow obstruction |  | NR | NR | NR | NR | NR |
| Quadriceps muscle strength | The Strainstall ‘Junior Load Cell’ or Omega LCM101-250 | X |  |  |  | Total group | T2 | NR | NR | NR | NR | NS |
| Subgroup airflow obstruction | From baseline to 4 weeks post-op | NR | NR | 4.7 | 0.18; 0.20 | **0.04** |
| From baseline to time of hospital discharge | NR | NR | NR | NR | 0.47 |
| Physical functioning | SF-36 | X |  |  |  | Total group | T2 | NR | NR | NR | NR | NS |
| Subgroup airflow obstruction | Change between baseline and 4 weeks post-op | 24 | 9 | 18 | 3.0; 32.4 | **0.02** |
| Role functioning |  |  |  | X | Total group | T2 | NR | NR | NR | NR | NS |
| Subgroup airflow obstruction | Change between baseline and 4 weeks post-op | 43 | 32 | 24 | –3.8; 52.7 | 0.13 |
| Fatigue | EORTC QLQ-LC13 |  |  | X |  | Total group |  | NR | NR | NR | NR | NS |
| Subgroup airflow obstruction |  | NR | NR | NR | NR | NS |
| Bhatia et al, 2019, Switzerland | Distance walked (m) | 6MWT | X |  |  |  |  | At end of intervention | 66 (median) | –2 (median) | 20% (median) | 14; 26 | **< 0.001** | Low |
| Brocki et al, 2014, Denmark and Sweden | Physical functioning | SF-36 (v2) | X |  |  |  |  | Mean change baseline to 4 months | 8.4 | 6.4 | 4.39 | –4; 12.8 | 0.3 |  |
| Mean change baseline to 1 year | 4.8 | 14.5 | -4.87 | –13.7; 4 | 0.28 |
| Role functioning |  |  |  | X | Mean change baseline to 4 months | 28.1 | 15 | 12.04 | –1; 25.1 | **0.07** |
| Mean change baseline to 1 year | 26.4 | 34.9 | -6.93 | –20.7; 6.99 | 0.33 |
| Functional exercise capacity (m) | 6MWT | X |  |  |  | Mean change baseline to 4 months | 61 | 55 | 8.33 | –20; 36.27 | 0.57 |
| Mean change baseline to 1 year | 65 | 60 | 1.31 | –28.18; 30.8 | 0.93 |
| Dyspnea | Borg Scale |  | X |  |  | Mean change baseline to 4 months | 1.19 | 0.12 | 0.98 | –0.25; 2.21 | 0.12 |
| Mean change baseline to 1 year | 0.74 | 0.62 | -0.19 | –1.48; 1.1 | 0.77 |
| Experienced dyspnoea | Borg CR10 scale (PR, NR) |  | X |  |  | Mean change baseline to 4 months | 2.1 (1.8) | 1.3 (2) | NR | NR | NR |
| Change from baseline to 2 weeks | 0.77 (1.51) | 1.12 (1.91) | -0.34 | -1.2; 0.5 | 0.34 |
| Brocki et al, 2015, DenmarK, Sweden, and Belgium | Physical/functional performance | 6MWT | X |  |  |  |  | Change from baseline to fifth day | –121.6 (92.2) | –113.9 (106.9) | NR | NR | NR | High |
| Change from baseline to 2 weeks | –48.1 (71.9) | –31.7 (79.1) | –16.4 | –54.2; 21.3 | 0.21 |
| Experienced dyspnoea | Borg CR10 scale |  | X |  |  | Change from baseline to fifth day | 2.1 (1.8) | 1.3 (2) | NR | NR | NR |
| Change from baseline to 2 weeks | 0.77 (1.51) | 1.12 (1.91) | –0.34 | –1.2; 0.5 | 0.34 |
| Brocki et al, 2018, Denmark and Sweden | Sedentary activity (%) | Physical Activity Scale 2.1 questionnaire (PR, NR) | X |  |  |  |  | T0 | 0 | 6 | NR | NR | 0,12 | High |
| T1 | 6 | 22 | NR | NR | **0.006** |
| Cavalheri et al, 2016, Australia | 6- minute walk distance (m) | 6MWT | X |  |  |  |  | Change baseline to post-intervention | 45 | -8 | 52 | 12; 93 | **0.02** | Some concerns |
| Sedentary behavior (%) | The SenseWear armband | X |  |  |  |  | Change baseline to post-intervention | –3 | –7 | 4 | –4; 11 | 0.31 |
| Fatigue | Borg scale 6MWT |  |  | X |  |  | Change baseline to post-intervention | 0.8 | 0.7 | 0.0 | –2.4; 2.5 | 0.97 |
| Dyspnea | Borg scale 6MWT |  | X |  |  |  | Change baseline to post-intervention | –0.5 | 0.3 | –0.9 | –3.0; 1.3 | 0.40 |
| Physical functioning | SF-36 | X |  |  |  |  | Change baseline to post-intervention | 7 | 3 | 5 | –9; 19 | 0.49 |
| Role physical | SF-36 |  |  |  | X |  | Change baseline to post-intervention | –3 | 0 | –3 | –27; 21 | 0.81 |
| Lai et al, 2016, China | 6-min walking distance (m) | 6MWT | X |  |  |  |  | Change before and after the exercise | 28.6 (18.2) | 9.4 (27.0) | 19.2 | 2.1; 36.3 | **0.029** | Some concerns |
| Physical function | EORTC QLQ-C30 | X |  |  |  | Change before and after the exercise | NR | NR | –0.67 | –4.0; 2.7 | 0.691 |
| Dyspnea | EORTC QLQ-LC13_CN |  | X |  |  | Change before and after the exercise | NR | NR | 0.37 | –2.7; 3.4 | 0.808 |
| Cheung et al, 2021, China and Taipei | Exercise capacity (m) | 6MWT | X |  |  |  | Aerobic exercise group | Change from baseline to post-intervention | –7.71 | 31.19 | NR | NR | NR | Some concerns |
| Change from baseline to 6-month follow-up | 21.98 | 42.43 | NR | NR | NR |
| Change from baseline to 1-year follow-up | 5.39 | 26.98 | NR | NR | NR |
| Exercise capacity (m) | X |  |  |  | Tai-chi group | Change from baseline to post-intervention | 19.42 | 31.19 | NR | NR | NR |
| Change from baseline to 6-month follow-up | –0.91 | 42.43 | NR | NR | NR |
| Change from baseline to 1-year follow-up | 37.35 | 26.98 | NR | NR | NR |
| Edvarsen et al., 2014, Norway | Concentric leg strength (maximum kg) | Sum of maximum weight that could be lifted once using a horizontal hip and knee extension movement | X |  |  |  |  | T0 | 131.9 (45.7) | 131.6 (48.5) | NR | NR | NR | Some concerns |
| T2 | 159.3 (48.4) | 129.5 (39.5) | NR | NR | NR |
| Change T0-T2 | 27.4 (26.2) | –2.1 (25.0) | 29.5 | 15.2; 43.7 | **<0.001** |
| Maximum hand strength (maximum kg) | Grip strength dynamometer | X |  |  |  |  | T0 | 34.2 (11.5) | 32.9 (8.4) | NR | NR | NR |
| T2 | 36.6 (11.4) | 33.3 (8.6) | NR | NR | NR |
| Change T0-T2 | NR | NR | 2.1 | 0.0; 4.1 | 0.056 |
| Physical functioning | Chair stand test (times) | X |  |  |  |  | T0 | 11.4 (2.1) | 11.4 (3.5) | NR | NR | NR |
| T2 | 14.3 (2.8) | 12.2 (3.0) | NR | NR | NR |
| Change T0-T2 | NR | NR | 2,1 | 0.8; 3.3 | **<0.001** |
| maximum stair steps for 15 s | X |  |  |  |  | T0 | 30,5 (8,3) | 28,3 (9,9) | NR | NR | NR |
| T2 | 37,0 (9,5) | 30,8 (9,3) | NR | NR | NR |
| Change T0-T2 | NR | NR | 4.3 | 1.6; 7.1 | **0.002** |
| a modified one-foot static balance test on soft ground for a maximum of 60 s | X |  |  |  |  | Change T0-T2 | NR | NR | NR | NR | NS |
| SF-36 | X |  |  |  |  | T2 | 51.8 (5.5) | 43.3 (11.3) | NR | NR | **0.006** |
| Dyspnoea | EORTC QLQ-C30 |  | X |  |  |  | T2 | 37.0 (25.3) | 58.0 (32.1) | NR | NR | **0.03** |
| Egegaard et al., 2019, Denmark | 6MWD (m) | 6MWT | X |  |  |  |  | T0 | 437 (126) | 574 (89) | NR | NR | NR | High |
| T1 | 470 (82) | 577 (67) | NR | NR | NR |
| Change T0-T1 | NR | NR | 18,41 | –15.51; 52.34 | 2.543 |
| Steps (day) | Garmin® vívosmart®HR activity tracker | X |  |  |  |  | During intervention period | 6254 (2337) | 7572 (2445) | 1318 | –4458; 1821 | 0.3632 |
| Functional well-being | FACT-L |  |  |  | X |  | T0 | 17.6 (5.4) | 17.4 (7.1) | NR | NR | NR |
| T1 | 18.0 (5.5) | 17.4 (4.7) | NR | NR | NR |
| Change T0-T1 | NR | NR | –0.52 | –6.85; 5.79 | 0.854 |
| Granger et al., 2013, Australia | 6MWD (m) | 6MWT | X |  |  |  |  | T0 | 677.0 (89.3) | 435.8 (98.2) | NR | NR | NR | Some concerns |
| T1 | 647.5 (53.1) | 426.0 (64.3) | NR | NR | NR |
| T2 | 705.7 (65.3) | 458.2 (38.6) | NR | NR | NR |
| Change T0-T2 | NR | NR | NR | NR | **0.024** |
| Functional mobility | TUG | X |  |  |  |  | T0 | 6.3 (1.6) | 9.0 (2.6) | NR | NR | NR |
| T1 | 4.4 (2.6) | 6.0 (3.2) | NR | NR | NR |
| T2 | 4.9 (0.8) | 6.8 (1.5) | NR | NR | NR |
| Change T0-T2 | NR | NR | NR | NR | **0.041** |
| Physical functioning | EORTC-QLQ-C30-L13 | X |  |  |  |  | T0 | 89.3 (13.0) | 84.4 (19.2) | NR | NR | NR |
| T1 | NR | NR | NR | NR | NR |
| T2 | 85.3 (18.5) | 68.9 (17.2) | NR | NR | NR |
| Change T0-T2 | NR | NR | NR | NR | NS |
| Role functioning |  |  |  | X |  | T0 | 86.7 (21.7) | 88.9 (13.6) | NR | NR | NR |
| T1 | NR | NR | NR | NR | NR |
| T2 | 73.3 (43.5) | 77.8 (20.2) | NR | NR | NR |
| Change T0-T2 | NR | NR | NR | NR | NS |
| Fatigue |  |  | X |  |  | T0 | 44.4 (26.0) | 25.9 (22.9) | NR | NR | NR |
| T1 | NR | NR | NR | NR | NR |
| T2 | 42.2 (31.8) | 38.9 (29.6) | NR | NR | NR |
| Change T0-T2 | NR | NR | NR | NR | NS |
| Dyspnea |  | X |  |  |  | T0 | 26.7 (28.9) | 27.8 (25.1) | NR | NR | NR |
| T1 | NR | NR | NR | NR | NR |
| T2 | 33.3 (23.6) | 38.9 (25.1) | NR | NR | NR |
| Change T0-T2 | NR | NR | NR | NR | NS |
| Physical function | SF-36 | X |  |  |  |  | T0 | 46.2 (6.8) | 47.4 (3.4) | NR | NR | NR |
| T1 | NR | NR | NR | NR | NR |
| T2 | 50.6 (6.7) | 38.0 (11.6) | NR | NR | NR |
| Change T0-T2 | NR | NR | NR | NR | NS |
| Role physical |  |  |  | X |  | T0 | 40.9 (10.3) | 42.7 (10.3) | NR | NR | NR |
| T1 | NR | NR | NR | NR | NR |
| T2 | 40.3 (13.5) | 41.3 (8.0) | NR | NR | NR |
| Change T0-T2 | NR | NR | NR | NR | NS |
| Henke et al., 2014, Norway and Germany | Functional capacity | 6MWT | X |  |  |  |  | T0 | 378.35 (106.71) | 240.83 (150.50) | NR | NR | **<0.05** | High |
| T1 | 397.06 (102.56) | 193.33 (162.78) | NR | NR | **<0.05** |
| Staircase walking (amount of steps) | X |  |  |  |  | T0 | 130.24 (51.18) | 79.42 (50.74) | NR | NR | **<0.05** |
| T1 | 136,18 (47,53) | 52.08 (5.85) | NR | NR | **<0.05** |
| Muscle strength (max. amount of rep.) | Biceps curl | X |  |  |  |  | T0 | 25.35 (10.42) | 14.17 (9.04) | NR | NR | **<0.05** |
| T1 | 27.41 (9.75) | 11,75 (10.39) | NR | NR | **<0.05** |
| Triceps extension | X |  |  |  |  | T0 | 25.47 (10.70) | 16.25 (10.93) | NR | NR | **<0.05** |
| T1 | 27.12 (9.81) | 11.08 (9.00) | NR | NR | **<0.05** |
| Bridging | X |  |  |  |  | T0 | 11.82 (6.88) | 9.25 (7.24) | NR | NR | **<0.05** |
| T1 | 13.94 (6.69) | 7.08 (7.45) | NR | NR | **<0.05** |
| Abdominal exercise | X |  |  |  |  | T0 | 10.24 (5.72) | 6.83 (6.87) | NR | NR | **<0.05** |
| T1 | 11.71 (5.67) | 5,.00 (5.94) | NR | NR | **<0.05** |
| Physical functioning | EORTC QLQ-C30 | X |  |  |  |  | T0 | 75.42 (28.46) | 55.38 (29.86) | NR | NR | **<0.05** |
| T1 | 74.58 (21.94) | 48.20 (32.90) | NR | NR | **<0.05** |
| Role functioning |  |  |  | X |  | T0 | 66.67 (32.20) | 53.85 (40.34) | NR | NR | NS |
| T1 | 59.37 (32.19) | 51.28 (39.36) | NR | NR | NS |
| Fatigue |  |  | X |  |  | T0 | 43.75 (28.82) | 59.83 (29.93) | NR | NR | NS |
| T1 | 50.69 (27.51) | 64.10 (36.61) | NR | NR | NS |
| Dyspnoea | EORTC QLQ-C30 |  | X |  |  |  | T0 | 37.50 (23.96) | 64.10 (34.59) | NR | NR | **<0.05** |
| T1 | 35.42 (30.96) | 51.28 (35.00) | NR | NR | NS |
| EORTC QLQ-LC-13 |  | X |  |  |  | T0 | 30.56 (19.25) | 58.97 (31.22) | NR | NR | NS |
| T1 | 23.61 (20.64) | 45.30 (34.08) | NR | NR | NS |
| Patient’s independence in activities of daily living | Barthel Index |  |  |  | x |  | T0 | 98.33 (4.20) | 92.08 (15.15) | NR | NR | 0.127 |  |
| T1 | 92.08 (6.24) | 81.67 (14.98) | NR | NR | **0.003** |
| Hwang et al., 2012, Taiwan | Physical functioning | EORTC QLQ-C30 | X |  |  |  |  | T0 | 93.8 (6.9) | 90.3 (12.1) | NR | NR | 0.88 | Some concerns |
| T1 | 92.3 (6.6) | 87.9 (11.9) | NR | NR |
| Role functioning |  |  |  | X |  | T0 | 96.2 (7.3) | 90.9 (15.6) | NR | NR | 0.08 |
| T1 | 96.1 (7.3) | 90.9 (15.6) | NR | NR |
| Dyspnea |  | X |  |  |  | T0 | 9.6 (10.7) | 15.2 (14.3) | NR | NR | 0.06 |
| T1 | 3.8 (5.5) | 13.6 (14.6) | NR | NR |
| Fatigue | Combination EORTC QLQ-C30 and EORTC QLQ-LC13 |  |  | X |  |  | T0 | 14.5 (18.2) | 26.3 (20.0) | NR | NR | 0.30 |
| T1 | 9.4 (11.9) | 17.2 (18.2) | NR | NR |
| Jastrzebski et al., 2015, Poland | Dyspnea | MRC |  | X |  |  |  | Pre intervention | 1.3 (1.1) | 1.4 (0.9) | NR | NR | NR | High |
|  | Post intervention | 0.6 (0.5) | 1.8 (1.3) | NR | NR | NR |
| Exercise capacity (6MWD in m) | 6MWT | X |  |  |  |  | Pre intervention | 527.3 (107.4) | 502.8 (105.0) | NR | NR | NR |
|  | Post intervention | 563.9 (64.6) | 509.4 (134.3) | NR | NR | NR |
| Physical functioning | SF-36 | X |  |  |  |  | Pre intervention | 47.7 (17.7) | 48.6 (10.9) | NR | NR | NR |
|  | Post intervention | 45.3 (7.5) | 45.5 (11.8) | NR | NR | NR |
| Role functioning |  |  |  | X |  | Pre intervention | 34.1 (18.9) | 46.5 (9.2) | NR | NR | NR |
|  | Post intervention | 39.5 (12.9) | 43.1 (10.6) | NR | NR | NR |
| Johnson et al., 2019, Sweden | 6MWD (m) | 6MWT | X |  |  |  |  | Change pre-op and 3 months post-op | –15 | –9 | NR | NR | 0.63 | Some concerns |
| Subjectively reported physical activity | IPAQ-E (low/moderate/high) | X |  |  |  |  | Pre-op | 21 / 19 /14 | 16 / 23 / 14 | NR | NR | 0.56 |
| Post-op | 11 / 26 /17 | 15 / 24 / 14 | NR | NR | 0.45 |
| Objectively measured physical activity (steps/day) | Accelerometer | X |  |  |  |  | 3 months post-op | 4100 | 3934 | NR | NR | 0.77 |
| Dyspnea | The Modified Medical Research Council Dyspnea Scale |  | X |  |  |  | 3 months post-op | 1 – 2 | 1 | NR | NR | 0.56 |
| Johnson et al., 2019b, Sweden | Objective physical activity (steps per hour) | Accelerometer | X |  |  |  |  | First three days post-op | 49 (47) | 37 (34) | 14 | 3; 30 | **<0.05** | Some concerns |
| Physical activity (6MWD) | 6MWT | X |  |  |  |  | Baseline | 477 (median) | 471 (median) | NR | NR | 0.70 |
| Post-op (% of preoperative) | 71 (22) | 79 (16) | NR | NR | 0.13 |
| Dyspnea | M-MRC |  | X |  |  |  | Baseline | 1 (median) | 1 (median) | NR | NR | 0.49 |
| Post-op | 2 (median) | 2 (median) | NR | NR | 0,74 |
| Licker et al., 2016, Switzerland | 6-min walking distance (m) | 6MWT | X |  |  |  |  | Change before and after intervention | +66 (8; 125) | –2 (–9; 5) | NR | NR | **0.001** | Low |
| Molassiotis et al, 2014, Hong kong, UK, Cyprus | Worst breathlessness | Numerical Rating Scale |  | X |  |  |  | T1 | NR | NR | NR | NR | NR | High |
| T2 | NR | NR | NR | NR | NR |
| T3 | NR | NR | NR | NR | **0.003** |
| Average breathlessness |  | X |  |  | T1 | NR | NR | NR | NR | NR |
| T2 | NR | NR | NR | NR | NR |
| T3 | NR | NR | NR | NR | **0.019** |
| Dyspnoea | mBorg scale |  | X |  |  | T1 | NR | NR | NR | NR | NR |
| T2 | NR | NR | NR | NR | **0.029** |
| T3 | NR | NR | NR | NR | NR |
| Dyspnoea | CRDQ |  | X |  |  | T1 | NR | NR | NR | NR | NR |
| T2 | NR | NR | NR | NR | NR |
| T3 | NR | NR | NR | NR | NR |
| Fatigue |  |  | X |  | T1 | NR | NR | NR | NR | NR |
| T2 | NR | NR | NR | NR | **0.005** |
| T3 | NR | NR | NR | NR | NR |
| Rotolo et al., 2019, Italy | Dyspnoea | The Borg Scale |  | X |  |  |  | Preoperative | 0 (median) | 0 (median) | NR | NR | 0.54 | High |
| POD1 | 1.0 (median) | 1.5 (median) | NR | NR | 0.98 |
| POD4 | 2.0 (median) | 1.5 (median) | NR | NR | 0.90 |
| POD7 | 1.0 (median) | 1 (median) | NR | NR | 0,83 |
| Rutkowska et al., 2019, Poland and VS | 6MWD (m) | 6MWT | X |  |  |  |  | Baseline (pre) | 486 (92) | 487 (100) | NR | NR | NR | High |
| Day 42 (post) | 531 (103) | 490 (124) | NR | NR | NR |
| Change pre – post | 10.4 | 0.3 | NR | NR | 0.09 |
| Functional fitness | chair stand | X |  |  |  |  | Baseline (pre) | 13.3 (2.8) | 11 (1.8) | NR | NR | NR |
| Day 42 (post) | 14.3 (3.4) | 11.2 (1.5) | NR | NR | NR |
| Change pre – post | 7.2 (9.2) | 2.4 (6.0) | NR | NR | 0.17 |
| arm curl | X |  |  |  |  | Baseline (pre) | 18.4 (3.1) | 15.2 (3,0) | NR | NR | NR |
| Day 42 (post) | 20.4 (3.5) | 16.2 (3.3) | NR | NR | NR |
| Change pre – post | 11.8 (13.4) | 6.9 (9.7) | NR | NR | 0,36 |
| chair sit-and-reach | X |  |  |  |  | Baseline (pre) | 1.9 (6.6) | –3.3 (3.6) | NR | NR | NR |
| Day 42 (post) | 2.2 (6.2) | –4.4 (3.4) | NR | NR | NR |
| Change pre – post | –3.3 (15.1) | –14.7 (105.1) | NR | NR | 0,20 |
| up and go | X |  |  |  |  | Baseline (pre) | 6.3 (1.0) | 6.0 (0.4) | NR | NR | NR |
| Day 42 (post) | 6.0 (1.1) | 6.3 (0.8) | NR | NR | NR |
| Change pre – post | 3.8 (6.4) | –5.3 (7.3) | NR | NR | **0,01** |
| back scratch | X |  |  |  |  | Baseline (pre) | –1.8 (7.1) | –9.1 (6.1) | NR | NR | NR |
| Day 42 (post) | –1.5 (103) | –8.1 (4.6) | NR | NR | NR |
| Change pre – post | –5.0 (45.9) | 3.8 (20,6) | NR | NR | 0,52 |
| Dyspnea | mMRC questionnaire |  | X |  |  |  | Baseline (pre) | 0.7 (0.9) | 0.6 (1.0) | NR | NR | NR |
| Day 42 (post) | 0.7 (1.0) | 0.3 (0.7) | NR | NR | NR |
| Change pre – post | 0,7 (0.9) | 0.7 (1.0) | NR | NR | 0.18 |
| BDI |  | X |  |  |  | Baseline (pre) | 9.5 (2.1) | 9.9 (2.6) | NR | NR | NR |
| Day 42 (post) | 9.5 (2.4) | 9.8 (2.4) | NR | NR | NR |
| Change pre – post | 9.5 (2.1) | 9.5 (2.4) | NR | NR | 0.83 |
| Borg Scale |  | X |  |  |  | Baseline (pre) | 1.7 (2.2) | 1.1 (1.0) | NR | NR | NR |
| Day 42 (post) | 1,5 (2.1) | 2.6 (2.5) | NR | NR | NR |
| Change pre – post | 1,7 (2.2) | 1.5 (2.1) | NR | NR | **0.04** |
| Rutkowska et al., 2021, Poland | Physical functioning | SF-36 | X |  |  |  |  | Baseline (pre) | 47.75 | 52.80 | NR | NR | NR | Some concerns |
| Day 42 (post) | 47.75 | 52.25 | NR | NR | NR |
| Change pre – post | NR | NR | NR | NR | 0.15 |
| Role functioning |  |  |  | X | Baseline (pre) | 43.40 | 43.40 | NR | NR | NR |
| Day 42 (post) | 42.10 | 47.10 | NR | NR | NR |
| Change pre – post | NR | NR | NR | NR | 0.85 |
| Functional wellbeing | FACT-L |  |  |  | X | Baseline (pre) | 18.5 | 17.5 | NR | NR | NR |
| Day 42 (post) | 19.5 | 22.0 | NR | NR | NR |
| Change pre – post | NR | NR | NR | NR | 0.78 |
| Scott et al., 2021, USA | Functional wellbeing | FACT-G |  |  |  | X | Aerobic training | Change pre – post | NR | NR | +2.0 | -0.4; 4.5 | 0.10 | High |
| Fatigue | FACIT-Fatigue |  |  | X |  |  | Change pre – post | NR | NR | -1.7 | -3.8; 0.4 | 0.11 |
| VO2 peak | mL O2·kg_1·min_1 | X |  |  |  |  | Change pre – post | NR | NR | +1.1 | 0.2; 2.2 | **0.04** |
| Physical wellbeing | FACT-G | X |  |  |  |  | Change pre – post | NR | NR | 0 | -1.4; 1.4 | 0.98 |
| Functional wellbeing | FACT-G |  |  |  | X | Resistance training | Change pre – post | NR | NR | -1.1 | -3.4; 1.3 | 0.37 |
| Fatigue | FACIT-Fatigue |  |  | X |  |  | Change pre – post | NR | NR | +0.1 | -2; 2.2 | 0.93 |
| VO2 peak | mL O2·kg_1·min_1 | X |  |  |  |  | Change pre – post | NR | NR | -0.1 | -1.2;1 | 0.88 |
| Physical wellbeing | FACT-G | X |  |  |  |  | Change pre – post | NR | NR | +0.1 | -1.3; 1.5 | 0.92 |
| Functional wellbeing | FACT-G |  |  |  | X | Combination training | Change pre – post | NR | NR | +1.0 | -1.4; 3.5 | 0.41 |
| Fatigue | FACIT-Fatigue |  |  | X |  |  | Change pre – post | NR | NR | -0.5 | -2.7; 1.7 | 0.64 |
| VO2 peak | mL O2·kg_1·min_1 | X |  |  |  |  | Change pre – post | NR | NR | +1.4 | 0.2; 2.5 | **0.02** |
| Physical wellbeing | FACT-G | X |  |  |  |  | Change pre – post | NR | NR | -1.2 | -2.6; 0.3 | 0.11 |
| Sebio Garcia et al., 2016, Spain | Physical functioning | SF-36 | X |  |  |  |  | Change pre- to post | NR | NR | +7.5 (13.4) | –2.1; 17.1 | 0.110 | High |
| Role physical |  |  |  | X |  | Change pre- to post | NR | NR | +21.5 (27.9) | 1.54; 41.4 | **0.038** |
| Exercise capacity | Constant-load Cycle Endurance Test (CCET) | X |  |  |  |  | Change baseline to postsurgery | 137.7 (268.2) | –25.8 (16.71) | NR | NR | 0.097 |
| Change baseline to 3 months | 226 (269.4) | –137.8 (221.7) | NR | NR | **0.005** |
| Functional capacity (6MWD in m) | 6MWT | X |  |  |  |  | Change baseline to postsurgery | –15.55 (47.731) | –27.7 (33.7) | NR | NR | 0.500 |
| Change baseline to 3 months | 1.88 (221.7) | –31.5 (64.6) | NR | NR | 0.186 |
| Upper and lower body strength | Arm Curl test | X |  |  |  |  | Change baseline to postsurgery | 1.9 (3) | –0.25 (2.9) | NR | NR | 0.105 |
| Change baseline to 3 months | 1.8 (3,3) | –1.8 (3.5) | NR | NR | **0.045** |
| 30’s Chair-to-Stand Test | X |  |  |  |  | Change baseline to postsurgery | –0.55 (3.5) | 0.5 (3.9) | NR | NR | 0.531 |
| Change baseline to 3 months | 2 (2.2) | –1.3 (1.8) | NR | NR | **0.002** |
| Stefanelli et al., 2013, Italy | Dyspnoea | Borg scale |  | X |  |  |  | T0 | 1.7 (2.2) | 1.9 (0.6) | NR | NR | NR | High |
| T1 | 0.9 (1.0) | 1.8 (0.7) | NR | NR | NR |
| T2 | 2.0 (1.2) | 3.1 (0.7) | NR | NR | NR |
| Tan et al., 2019, Malaysia | Dyspnoea | MBDS |  | X |  |  | Subgroup lung cancer patients | Change To -T5 | –1.0 (median) | 0 (median) | NR | NR | **0.041** | Some concerns |
| Change T0-T20 | –2.0 (median) | 0 (median) | NR | NR | -0.147 |
| Wang et al., 2020, China | Dyspnea | mMRC |  | X |  |  |  | Change from baseline until T1 | 0 | 0 | NR | NR | **0.05** | High |
| Change from baseline until T3 | 1 | 1 | NR | NR | **<0.001** |
| 6MWD | 6MWT | X |  |  |  |  | Change from baseline until T1 | 12 | 0 | NR | NR | **0.035** |
| Change from baseline until T3 | –160 | –147 | NR | NR | 0.698 |
| Zhang et al., 2015, China | Fatigue | MFSI-SF |  |  | X |  |  | T0 | 46.0 (11.6) | 46.8 (12.2) | NR | NR | NS | Some concerns |
| T1 | 59.5 (11.3) | 66.8 (11.9) | NR | NR | **<0.05** |
| T2 | 53.3 (11.8) | 59.3 (12.2) | NR | NR | **<0.05** |
| Salhi et al., 2015, Belgium | Physical functioning | EORTC QLQ-C30 | X |  |  |  | CRT | Change M2 – M3 | 6 | 2 | 5 | –6; 15 | 1.000 | Some concerns |
| WBVT | Change M2 – M3 | 8 | 2 | 7 | –4; 18 | 0.693 |
| 6MWD (m) | 6MWT | X |  |  |  | CRT | Change M2 – M3 | 95 | 1 | 94 | 43; 145 | **0.002** |
| WBVT | Change M2 – M3 | 37 | 1 | 36 | –14; 87 | 0.480 |
| Fatigue | FACT-F |  |  | X |  | CRT | Change M2 – M3 | –3 | –1 | -2 | –7; 3 | 1,000 |
| WBVT | Change M2 – M3 | –2 | –1 | -2 | –6; 5 | 1,000 |
| Dyspnoea | VAS |  | X |  |  | CRT | Change M2 – M3 | –1 | –1 | 0 | –2; 2 | 1,000 |
| WBVT | Change M2 – M3 | –2 | –1 | –1 | –2; 1 | 1,000 |
| Dimeo et al., 2004, Germany | Physical functioning | EORTC-QLQ-C30 | X |  |  |  |  | Before treatment | 76 (16) | 72 (16) | NR | NR | NS | Some concerns |
| After treatment | 76 (16) | 75 (16) | NR | NR | NS |
| Role functioning |  |  |  | X | Before treatment | 61 (31) | 56 (34) | NR | NR | NS |
| After treatment | 62 (32) | 61 (36) | NR | NR | NS |
| Dypsnea |  | X |  |  | Before treatment | 32 (33) | 26 (33) | NR | NR | NS |
| After treatment | 30 (33) | 32 (32) | NR | NR | NS |
| Fatigue |  |  | X |  | Before treatment | 43 (26) | 48 (25) | NR | NR | NS |
| After treatment | 34 (21) | 39 (26) | NR | NR | NS |
| Salhi et al., 2014, Belgium | QF (N m) | Iso-metric handheld dynamometer | X |  |  |  |  | M1 | 123 (37) | 124 (54) | NR | NR | NS | High |
| M2 | 109 (29) | 91 (32) | NR | NR | NS |
| M3 | 119 (40) | 97 (36) | NR | NR | NS |
| Type 2: Acupuncture / acupressure intervention | | | | | | | | | | | | | | |
| Cheng et al, 2017, China | Intensity of cancer-related fatigue (CRF) | Chinese version of the Brief Fatigue Inventory (BFI-C) |  |  | X |  |  | At 2 weeks | 5.1 | 6.3 | 1.2 | 0.4; 2.0 | **<0.01** | Some concerns |
| At 4 weeks | 5.2 | 6.6 | 1.4 | 0.5; 2.3 | **0.005** |
| At 6 weeks | 4.5 | 7.1 | 2.6 | 1.7; 3.4 | **<0.001** |
| Dogan, 2020, Turkey | Walking distance (m) | 6MWT | X |  |  |  |  | Baseline | 286 | 308 | NR | NR | 0.830 | High |
| Post-intervention | 320 | 284 | NR | NR | **0.046** |
| Dyspnea | Borg Scale |  | X |  |  |  | Before 6MWT baseline | 5 | 4 | NR | NR | 0.087 |
| Before 6MWT post-intervention | 2 | 5 | NR | NR | **0.004** |
| After 6MWT baseline | 8 | 6 | NR | NR | 0.109 |
| After 6MWT post-intervention | 5 | 8 | NR | NR | **0.018** |
| Hou et al., 2017, China | Fatigue | RPFS |  |  | X |  | Igb | P1 | 1.91 (1.37) | 1.49 (1.58) | NR | NR | 0.142 | Some concerns |
| P2 | 2.59 (1.18) | 2.68 (1.36) | NR | NR | 0.724 |
| P3 | 2.80 (1.34) | 3.00 (1.29) | NR | NR | 0.821 |
| Igc | P1 | 1.68 (1.57) | 1.49 (1.58) | NR | NR | 0.490 |
| P2 | 2.85 (1.62) | 2.68 (1.36) | NR | NR | 0.526 |
| P3 | 2.06 (0.90) | 3.00 (1.29) | NR | NR | **<0.01** |
| Lin et al, 2019, China | Physical fatigue |  |  |  | X |  | Group A | At baseline | NR | NR | GA/C  -3.88 | -4.79 – 2.96 | **<0.01** | Some concerns |
| After treatment | NR | NR |
| Group B | At baseline | NR | NR | GB/C  -2.12 | -3.04 – 1.20 | **<0.01** |
| After treatment | NR | NR |
| Affective fatigue |  |  | X |  | Group A | At baseline | NR | NR | -1.89 | -2.69 – 1.10 | **<0.01** |
| After treatment | NR | NR |
| Group B | At baseline | NR | NR | -1.13 | -1.93 – 0.33 | **0.01** |
| After treatment | NR | NR |
| Cognitive fatigue |  |  | X |  | Group A | At baseline | NR | NR | -0.06 | -0.82– 0.70 | 0.88 |
| After treatment | NR | NR |
| Group B | At baseline | NR | NR | -0.33 | -1.10 – 0.44 | 0.40 |
| After treatment | NR | NR |
| Strong et al., 2016, California | Dyspnea | CDS |  | X |  |  |  | _ | NR | NR | NR | NR | **< 0.05** | High |
| Tang et al., 2014, Taiwan | Physical functioning | ECOG-PSR | X |  |  | X | Acupressure with essential oils | Group A x T1 | –4.55 | NR | NR | 0.00; 0.29 | **0.007** | Some concerns |
| Group A x T2 | –2.65 | NR | NR | 0.00; 2.68 | 0.153 |
| Acupressure only | Group B x T1 | –2.18 | NR | NR | 0.02; 0.88 | **0.037** |
| Group B x T2 | –1.05 | NR | NR | 0.04; 2.92 | 0.332 |
| Fatigue (total score) | TRFS |  |  | X |  | Acupressure with essential oils (group A) | Group A x T1 | –21.90 | NR | NR | NR | 0.440 |
| Group A x T2 | –20.71 | NR | NR | NR | 0.569 |
| Acupressure only (group B) | Group B x T1 | –27.65 | NR | NR | NR | 0.260 |
| Group B x T2 | –17.66 | NR | NR | NR | 0.594 |
| Fatigue in daily activity (subscale) |  |  | X |  | Acupressure with essential oils (group A) | Group A x T1 | –25.15 | NR | NR | NR | **0.024** |
| Group A x T2 | –26.41 | NR | NR | NR | 0.069 |
| Acupressure only (group B) | Group B x T1 | –20.03 | NR | NR | NR | **0.038** |
| Group B x T2 | –12.62 | NR | NR | NR | 0.385 |
| Type 3: Diet intervention | | | | | | | | | | | | | | |
| Gioxari et al., 2021, Greece | Physical activity intensity (METS – min/week) | The International Physical Activity Questionnaire | X |  |  |  |  | Baseline (T0) | 298.2 (112.4) | 283.8 (97.5) | NR | NR | 0.128 | High |
| 3 months (T1) | 350.0 (109,6) | 323.0 (84.2) | NR | NR | 0,053 |
| Change T0-T1 | NR | NR | NR | NR | 0,711 |
| Jiang et al., 2017, China and Korea | Fatigue | FSI |  |  | X |  |  | Pre-treatment | 8.92 (3.47) | 8.71 (3.95) | NR | NR | NR | Some concerns |
| Post-treatment | 8.69 (3.58) | 17.12 (5.24) | NR | NR | **<0,01** |
| Shortness of breath relief (% cases) | CM symptoms |  | X |  |  | Post-treatment | 73.1 | 20 | NR | NR | **<0,01** |
| Functional status | FACT-L scale | X |  |  |  | Pre-treatment | 12.14 (3.28) | 11.79 (1.79) | NR | NR | NR |
| Post-treatment | 15.03 (2.37) | 9.25 (1.77) | NR | NR | **<0,01** |
| Kiss et al., 2016, Australia | Fatigue | FACT-L (PWB domain) |  |  | X |  |  | T1 | 23.1 (1.6) | 20.2 (1.6) | NR | NR | NR | Some concerns |
| T2 | 22.9 (1.9) | 20.2 (1.8) | NR | NR | NR |
| T3 | 22.4 (1.9) | 17.5 (1.7) | NR | NR | NR |
| T4 | 26.3 (1.3) | 22.4 (1.2) | NR | NR | NR |
| T5 | 25.3 (1.1) | 23.2 (1.0) | NR | NR | NR |
| Functional status |  |  |  | X |  | T1 | 17.8 (1.6) | 19.0 (1.6) | NR | NR | NR |
| T2 | 16.6 (1.9) | 17.3 (1.9) | NR | NR | NR |
| T3 | 17.3 (1.5) | 13.4 (1.4) | NR | NR | NR |
| T4 | 17.6 (1.8) | 18.5 (1.7) | NR | NR | NR |
| T5 | 16.6 (1.8) | 19.3 (1.7) | NR | NR | NR |
| Sanchez-Lara et al., 2014, Mexico | Fatigue | EORTC-QLQ- C30  QLQ-LC13 |  |  | X |  |  | Change T0 –T2 | –10.4 (6) | –1.2 (0.7) | NR | NR | **0.04** | Some concerns |
| Physical functioning | X |  |  |  |  | Change T0 –T2 | 8 (3) | –1.8 (0.3) | NR | NR | 0.419 |
| Tian et al., 2010, China | Physical functioning | EORTC QLQ-C30 | X |  |  |  | Group A | At baseline | 12.15 (2.41) | 10.00 (1.62) | NR | NR | NR | Some concerns |
| After treatment | 10.38 (0.40) | 12.37 (0.40) | NR | NR | NS |
| Group B | At baseline | 11.00 (2.34) | 10.00 (1.62) | NR | NR | NR |
| After treatment | 11.38 (0.38) | 12.37 (0.40) | NR | NR | NS |
| Role functioning |  |  |  | X | Group A | At baseline | 5.80 (0.77) | 4.40 (0.68) | NR | NR | NR |
| After treatment | 5.66 (0.18) | 6.78 (0.19) | NR | NR | **<0.01** |
| Group B | At baseline | 5.70 (0.68) | 4.40 (0.68) | NR | NR | NR |
| After treatment | 6.159 (0.184) | 6.78 (0.19) | NR | NR | NS |
| Fatigue |  |  | X |  | Group A | At baseline | 8.20 (1.32) | 6.05 (0.39) | NR | NR | NR |
| After treatment | 6.32 (0.39) | 7.92 (0.65) | NR | NR | **<0.01** |
| Group B | At baseline | 6.40 (0.99) | 6.05 (0.39) | NR | NR | NR |
| After treatment | 7.79 (0.30) | 7.92 (0.65) | NR | NR | NS |
| Dyspnea |  | X |  |  | Group A | At baseline | 2.55 (0.51) | 2.10 (0.72) | NR | NR | NR |
| After treatment | 1.69 (0.11) | 2.04 (0.09) | NR | NR | **<0.05** |
| Group B | At baseline | 1.95 (0.83) | 2.10 (0.72) | NR | NR | NR |
| After treatment | 2.07 (0.10) | 2.04 (0.09) | NR | NR | NS |
| Van der meij et al., 2012, The Netherlands | Physical functioning | EORTC-QLQC30 | X |  |  |  |  | At baseline | 73.6 (20.2) | 68.3 (20.8) | NR | NR | 0.78 | Some concerns |
| Week 3 | NR | NR | –1,7 | NR | 0.76 |
| Week 5 | NR | NR | 11,6 | NR | **<0.01** |
| Role functioning |  |  |  | X |  | At baseline | 50.9 (39.0) | 50.0 (63.3) | NR | NR | 0.97 |
| Week 3 | NR | NR | –14,9 | NR | 0.21 |
| Week 5 | NR | NR | 17,0 | NR | 0.13 |
| Fatigue |  |  | X |  |  | At baseline | NR | NR | NR | NR | NR |
| Week 3 | NR | NR | 4,8 | NR | 0.57 |
| Week 5 | NR | NR | 0,5 | NR | 0.95 |
| Dyspnea |  | X |  |  |  | At baseline | NR | NR | NR | NR | NR |
| Week 3 | NR | NR | –10.4 | NR | 0.12 |
| Week 5 | NR | NR | –8.7 | NR | 0.46 |
| Physical activity in daily life | Physical activity monitor (PAM) accelerometer | X |  |  |  |  | At baseline | 7.2 (8.7) | 5.7 (5.0) | NR | NR | 0.84 |
| Week 3 | NR | NR | 6.6 | NR | **0.04** |
| Week 5 | NR | NR | 2.5 | NR | **0.05** |
| Handgrip strength | Hydraulic hand dynamometer | X |  |  |  |  | At baseline | 31.3 (9.8) | 26.1 (7.8) | NR | NR | 0.29 |
| Week 3 | NR | NR | 1.8 | NR | 0.15 |
| Week 5 | NR | NR | 1.8 | NR | 0.25 |
| Type 4: Multicomponent intervention | | | | | | | | | | | | | | |
| Bade et al., 2021, USA | Physical activity (minutes per week) | The Modifiable Activity Questionnaire | X |  |  |  |  | Change between week 1 and week 12 | 123.01 | 34.7 | NR | NR | 0.051 | High |
| Role functioning | EORTC-QLQ-C30 |  |  |  | X |  | Change week 1 – week 12 | 8.09 (5.33) | –8.95 (5.45) | 17.04 | NR | **0.022** |
| Physical functioning | X |  |  |  | Change week 1 – week 12 | 4.11 (2.50) | 4.74 (2.54) | –0.64 | NR | 0.853 |
| Fatigue |  |  | X |  | Change week 1 – week 12 | –4.43 (4.85) | 0.75 (4.97) | –5.18 | NR | 0.456 |
| Dyspnea |  | X |  |  | Change week 1 – week 12 | –6.19 (4.88) | 7.12 (4.99) | –13.31 | NR | 0.051 |
| Dyspnea | MMRC Dyspnea scale |  | X |  |  |  | Change week 1 – week 12 | –0.04 (0.15) | -0.07 (0.15) | 0.03 | NR | 0.889 |
| Bredin et al, 1999, UK | Breathlessness at worst | VAS |  | X |  |  |  | Change between baseline and 8 weeks | 1 (median change) | 4.8 (median change) | NR | NR | 0.14 | High |
| Breathlessness at best | Change between baseline and 8 weeks | 1.3 (median change) | 7.0 (median change) | NR | NR | **0.03** |
| Cheng et al, 2020, China | Exercise Ability | 6MWT | X |  |  |  |  | After treatment | NR | NR | NR | NR | **<0.01** | High |
| Dyspnea | Self-feeling score |  | X |  |  | After treatment | NR | NR | NR | NR | **<0.01** |
| Corner et al, 1996, UK | Breathlessness at best | VAS |  | X |  |  |  | Improvement from baseline to 4 weeks | 0.7 | –1.5 | NR | NR | NR | High |
| Improvement from baseline to 12 weeks | 0.5 | –0.5 | NR | NR | **<0.02** |
| Breathlessness at worst |  | Improvement from baseline to 4 weeks | 0.3 | 0 | NR | NR | NR |
| Improvement from baseline to 12 weeks | 3.5 | 0 | NR | NR | **<0.05** |
| Dhillon et al, 2017, Australia, USA, The Netherlands, Camperdown, Randwick, Concord, and Sydney. | Fatigue | 13-item Functional Assessment of Cancer Therapy-Fatigue (FACT-F) subscale |  |  | X |  |  | Baseline | 38.43 | 36.34 | NR | NR | NR | High |
| At 2 months | 37.53 (adjusted: 38.32) | 36.36 (adjusted: 38.16) | 1.17 (adjusted: 0.16) | –3.46; 5.80 (adjusted: –3.95; 4.27) | 0.618 (adjusted: 0.938) |
| At 4 months | 39.38 (adjusted: 39.84) | 35.33 (adjusted: 37.19) | 4.05 (adjusted: 2.65) | –0.88; 8.97 (adjusted: –1.80; 7.10) | 0.107 (adjusted: 0.241) |
| At 6 months | 36.67 (adjusted: 37.07) | 34.00 (adjusted: 35.76) | 2.67  (adjusted:1.31) | –2.58; 7.92  (adjusted: –3.51; 6.12) | 0.317 (adjusted:0.592) |
| Dyspnea | Shortness of Breath Questionnaire |  | X |  |  |  | Baseline | 25.25 | 20.56 | NR | NR | NR |
| At 2 months | 27.77 | 22.70 | 5.07 | –4.18; 14.32 | 0.281 |
| At 4 months | 25.62 | 23.53 | 2.09 | –7.54; 11.73 | 0.669 |
| At 6 months | 26.41 | 25.21 | 1.20 | –8.93; 11.34 | 0.815 |
| 6-min walking distance (m) | 6MWT | X |  |  |  |  | Baseline | 251.0 | 234.9 | NR | NR | NR |
| At 2 months | 517.7 | 516.3 | 1.39 | –75.9; 78.64 | NS |
| At 4 months | 547.2 | 512.7 | 34.52 | –57.1; 126.1 | NS |
| At 6 months | 545.3 | 538.0 | 7.28 | –93.1; 107.7 | NS |
| Physical functioning | EORTC-QLQ-C30 | X |  |  |  |  | Baseline | 75.85 | 77.38 | NR | NR | NR |
| At 2 months | 78.31 | 77.30 | 1.00 | –7.31; 9.32 | 0.812 |
| At 4 months | 78.31 | 77.30 | 1.00 | –9.78; 7.91 | 0.835 |
| At 6 months | 76.67 | 73.07 | 3.60 | –5.80; 12.99 | 0.452 |
| Role functioning |  |  |  | X |  | Baseline | 69.92 | 74.96 | NR | NR | NR |
| At 2 months | 73.68 | 75.96 | –2.28 | –14.4; 9.80 | 0.710 |
| At 4 months | 74.75 | 72.51 | 2.24 | –10.8; 15.33 | 0.736 |
| At 6 months | 71.09 | 68.14 | 2.95 | –11.1; 16.97 | 0.679 |
| Physical activity | Active Australia questionnaire | X |  |  |  |  | Baseline | 34.51 | 37.49 | NR | NR | NR |
| At 2 months | 48.98 | 40.42 | 8.56 | –10.8; 27.88 | 0.383 |
| At 4 months | 52.72 | 31.14 | 21.58 | 1.11; 42.04 | **0.039** |
| At 6 months | 51.44 | 27.66 | 23.78 | 2.48; 45.07 | **0.029** |
| Edbrooke et al., 2019, Australia | Functional exercise capacity (6MWD) | 6MWT | X |  |  |  |  | Change from baseline to 9 weeks | NR | NR | -25.36 | -63.98 – 13.26 | 0.198 | Low |
| Change from baseline to 9 weeks | NR | NR | 41.34 | -26.67 – 109.35 | 0.232 |
| Physical activity | International Physical Activity Questionnaire (IPAQ) | X |  |  |  | Change from baseline to 9 weeks | NR | NR | -139.01 | -1150.71 – 872.70 | **0.07**** |
| Change from baseline to 9 weeks | NR | NR | 402.48 | -1039.72 – 1844.68 | 0.584 |
| Gunes et al., 2020, Turkey | Physical functioning | FLIC | X |  |  |  |  | Pre-test | 34.07 (4.87) | 30.27 (8.41) | NR | NR | **0.036** | Some concerns |
| Post-test | 34.47 (4.52) | 31.4 (7.7) | NR | NR | 0.065 |
| Hoffman et al., 2016, US | CRF | BFI |  |  | X |  |  | Presurgery | 2.2 (2.0) | 2.0 (1.9) | NR | 0.73; 1.14 | 0.66 | Some concerns |
| Postsurgery | 4.1 (1.9) | 3.9 (2.7) | NR | 0.92; 1.3 | 0.74 |
| At week 6 | 0.7 (0.7) | 4.0 (2.0) | NR | –4.0; –2.6 | **<0.001** |
| Functional status or fatigability | 6MWT | X |  | X |  | Presurgery, Fatigue during 6MWT | 2.0 (1.7) | 1.5 (1.8) | NR | NR | NR |
| Presurgery, Distance walked | NR | NR | NR | NR | NR |
| Post 6 weeks, Fatigue during 6MWT | 0.4 (0.8) | 3.1 (1.5) | NR | -3.3; -2.1 | **<0.001** |
| Post 6 weeks, Distance walked | + 15% (15%) | -21% (19%) | NR | NR | **<0.001** |
| Change from presurgery to post 6 weeks, Fatigue during 6MWT | NR | NR | NR | NR | NR |
| Change from presurgery to post 6 weeks, Distance walked | NR | NR | NR | 28;44 | **<0.001** |
| Functional performance | The modified Borg Scale | X |  |  |  | Postsurgery | 30.2 | 32.7 | NR | NR | NR |
| Post 6 weeks | 45.2 | 38.8 | NR | NR | NR |
| Johnson et al., 2015, UK | Dyspnea | Chronic Respiratory Questionnaire |  | X |  |  |  | Baseline | 4.41 (1,25) | 4.38 (1.31) | NR | NR | NR | High |
| Week 4 | 4.41 (1,33) | 4.62 (1.43) | NR | –0.77; 0.35 | 0.47 |
| Lau et al., 2020, Hong Kong | Functional  wellbeing | FACT-G |  |  |  | X |  | T0 | 13.67 (5,96) | 13.31 (5.99) | NR | NR | NR | Some concerns |
| T1 | 18.02 (4,88) | 17.71 (5.36) | NR | NR | NR |
| T2 | 17.67 (5,28) | 17.00 (5.00) | NR | NR | NR |
| T3 | 18.13 (5,11) | 15.59 (4.83) | NR | NR | NR |
| Change over time | NR | NR | NR | NR | NS |
| Liu et al, 2020, China | Functional capacity | 6MWT | X |  |  |  |  | Pre-operative | NR | NR | 60.90 | 32.4 – 89.5 | **<0.001** | Some concerns |
| Molassiotis et al, 2021, China and Vietnam | Fatigue | FACT-F |  |  | X |  |  | Change from T0 to T1 | 2.25 | 0.82 | 0.93 | –0,091; 2.77 | 0.323 | Some concerns |
| Change from T0 to T2 | 2.71 | 0.04 | –0.50 | –2.24; 1.24 | 0.573 |
| Change from T1 to T2 | 0.46 | –0.86 | –1.82 | –4.51; 0.87 | 0.185 |
| Dyspnea | Cancer Dyspnea Scale (CDS) |  | X |  |  |  | Change from T0 to T1 | –1.43 | –0.31 | 0.03 | –1.06; 1.11 | 0.963 |
| Change from T0 to T2 | –1.23 | 0.24 | 1.15 | 0.24; 2.06 | **0.014** |
| Change from T1 to T2 | 0.20 | 0.55 | 1.50 | 0.19; 2.80 | **0.025** |
| Morano et al, 2013, Brazil and Spain | 6MWD (m) | 6MWT | X |  |  |  |  | Baseline | 425.5 (85.3) | 339.6 (107) | NR | NR | NR | Some concerns |
| Month 1 | 475 (86.5) | 335 (107) | NR | NR | NR |
| Quist et al., 2018, Denmark | 6MWD (m) | 6MWT | X |  |  |  |  | Change baseline – 14 weeks | 24 | 2 | –22 | –41; –2 | **0.029** | High |
| Change baseline – 26 weeks | 28 | 25 | 3 | –15; –21 | 0.751 |
| Change baseline 52 weeks | 26 | 16 | 10 | –11; 31 | 0.345 |
| Physical functioning | EORTC QLQ-C30 | X |  |  |  |  | Change baseline – 26 weeks | –2 | –1 | –1 | –6; 4 | 0.693 |
| Role functioning |  |  |  | X |  | Change baseline – 26 weeks | –2 | 2 | 0 | –9; 10 | 0.925 |
| Fatigue |  |  | X |  |  | Change baseline – 14 weeks | 0 | 10 | 10 | 2; 18 | **0.017** |
| Change baseline – 26 weeks | –2 | 1 | –3 | –11; 6 | 0.551 |
| Change baseline 52 weeks | 0 | 4 | –3 | –12; 5 | 0.431 |
| Dyspnea |  | X |  |  |  | Change baseline – 26 weeks | 9 | 17 | –8 | –18; 2 | 0.114 |
| Stigt et al., 2013, The Netherlands | Physical functioning | Short Form health survey (SF-36) | X |  |  |  |  | Change between baseline and at 3 months | NR | NR | NR | NR | NS | Some concerns |
| Role physical |  |  |  | X | Change between baseline and at 3 months | NR | NR | NR | NR | NS |
| 6MWD (m) | 6-minute walking distance test | X |  |  |  | Change between baseline and at 3 months | 35 (29) | –59 (24) | 94 (38) | NR | **0.024** |
| Sunahara et al., 2023,  Japan | 6MWD (m) | 6-minute walking distance test | X |  |  |  |  | Baseline to follow-up (median) | 10 | -17.5 | 27.5 | NR | **0.034** | High |
| Physical component summary | PCS | X |  |  |  |  | Baseline to follow-up (median) | -1 | -3.3 | 2.3 | NR | 0.401 |
| Role/social component summary | RCS |  |  |  | X |  | Baseline to follow-up (median) | 6.1 | -10 | 16.1 | NR | 0.055 |
| Dyspnea | CDS |  | X |  |  |  | Baseline to follow-up (median) | 4 | 3 | 1 | NR | 0.972 |
| Fatigue | CFS |  |  | X |  |  | Baseline to follow-up (median) | -2.5 | 0.3 | 2.8 | NR | **0.011** |
| Yorke et al., 2015, UK and China | Average breathlessness | NRS |  | X |  |  |  | Difference from baseline to week 4 | – 0.06 (1.55) | –0.38 (2.21) | 0.64 (0.50) | –0.34; 1.61 | 0.2 | High |
| Difference from baseline to week 12 | –0.17 (2.00) | –0.75 (2.33) | 0.65 (0.58) | –0.49; 1.80 | 0.26 |
| Breathlessness | D-12 scale |  | X |  |  |  | Mean group difference at week 4 | –2.98 (7.46) | –2.13 (7.41) | 4.32 (2.22) | –0.03; 8.67 | 0.05 |
| Mean group difference at week 12 | –3.04 (7.78) | –1.52 (8.31) | 5.19 (2.33) | 0.62; 9.75 | **0.026** |
| Fatigue | FACIT-F |  |  | X |  |  | Mean group difference at week 4 | –1.45 (9.5) | –2.44 (9.19) | 2.84 (2.70) | –2.45; 8.13 | 0.09 |
| Mean group difference at week 12 | –1.64 (10.01) | –1.28 (9.47) | 4.98 (2.89) | –0.68; 10.63 | 0.09 |
| Yorke et al., 2022, UK | Dyspnea | Dyspnoea-12 |  | X |  |  |  | 4 weeks | 12.86 (1.20) | 14.95 (1.14) | NR | -5.82; -0.48 | **0.021** | High |
| 12 weeks | 11.45 (1.31) | 14.35 (1.14) | NR | -7.09; -1.18 | **0.007** |
| Fatigue | FACIT-F |  |  | X |  | 4 weeks | 27.42 (1.69) | 23.90 (1.36) | NR | -0.38; 7.31 | 0.077 |
| 12 weeks | 28.62 (2.09) | 23.72 (1.44) | NR | 0.24; 9.57 | **0.039** |
| Yates et al., 2020, Australia | Dyspnea at worst | NRS |  | X |  |  |  | Change T1-T2 | –0.91 (2.27) | –0.67 (2.27) | –0.11 | –0.97; –0.51 | NR | High |
| Change T1-T3 | –1.08 (2.27) | –0.7 (2.28) | –0.17 | –1.30; –0.53 | 0.70 |
| Dyspnea at best |  | X |  |  | Change T1-T2 | –0.59 (1.93) | 0.12 (1.97) | –0.36 | –1.41; –0.02 | NR |
| Change T1-T3 | –0.75 (1.93) | 0.14 (1.98) | –0.46 | –1.70; –0.08 | **0.06** |
| Dyspnea on average |  | X |  |  | Change T1-T2 | –0.78 (1.93) | 0.01 (1.89) | –0.41 | –1.48; –0.12 | NR |
| Change T1-T3 | –0.93 (1.93) | 0.22 (1.90) | –0.60 | –1.98; –0.31 | **0.018** |
| Functional status | ECOG Performance Rating scale | X |  |  |  | Change T1-T2 | 0.01 (0.81) | 0.09 (0.85) | 0 | NR | NR |
| Change T1-T3 | 0.08 (0.80) | 0.16 (0.84) | 0 | NR | 0.537 |
| Type 5: Psychoeducation intervention | | | | | | | | | | | | | | |
| Carlson et al, 2013, Canada | Fatigue | Patients were also asked to ‘rate your average fatigue during the past week’ |  |  | X |  | Full screening group vs minimal screening group | At 3 months | 3.32 | 3.74 | NR | NR | NR | High |
| Triage group vs minimal screening group | At 3 months | 3.86 | 3.74 | NR | NR | NR |
| Full screening vs triage vs minimal screening group | At 3 months | NR | NR | NR | NR | 0.434 |
| Breathlessness | Physical problem score (range 0-3) |  | X |  |  | Full screening group vs minimal screening group | At 3 months | NR | NR | NR | NR | **0.03** |
| Triage group vs minimal screening group | At 3 months | NR | NR | NR | NR | 0.06 |
| Chan et al, 2011, UK and Hong Kong | Intensity of breathlessness | Visual analogue scale (VAS) |  | X |  |  |  | Change T0-T2 | NR | NR | NR | NR | **0.002** | High |
| Intensity of fatigue | The revised Piper Fatigue Scale |  |  | X |  | Change T0-T2 | NR | NR | NR | NR | **0.011** |
| Choratas et al, 2020, Australia | Breathlessness | Modified Borg Scale, Visual Analog Scale |  | X |  |  |  | Baseline (median) | 5.9 (1.6) | 5.5 (1.2) | NR | NR | 0.529 | High |
| Week 4 (median) | 5.1 (2.6) | 6.4 (1.8) | NR | NR | 0.228 |
| Fernandez-Rodriguez et al., 2019, Spain and Chile | Physical functioning | EORTC QLQ-C30 | X |  |  |  |  | 2nd session | 71.30 (21.60) | 68.82 (28.89) | NR | NR | NR | High |
| Last session | 56.36 (30.75) | 71.11 (26.67) | NR | NR | NR |
| 3rd follow-up | 75.00 (19.15) | 80.00 | NR | NR | NR |
| Role functioning |  |  |  | X |  | 2nd session | 74.06 (26.82) | 71.21 (36.80) | NR | NR | NR |
| Last session | 88.79 (31.70) | 77.78 (34.36) | NR | NR | NR |
| 3rd follow-up | 100 | 100 | NR | NR | NR |
| Fatigue |  |  | X |  |  | 2nd session | 29.11 (21.59) | 24.81 (23.65) | NR | NR | NR |
| Last session | 50.00 (32.54) | 27.78 (22.95) | NR | NR | NR |
| 3rd follow-up | 19.44 (23.27) | 18.18 (24.48) | NR | NR | 0.070 |
| Dyspnea |  | X |  |  |  | 2nd session | 2.67 (9.23) | 6.67 (22.15) | NR | NR | NR |
| Last session | 11.11 (27.22) | 5.56 (12.78) | NR | NR | NR |
| 3rd follow-up | 11.11 (21.71) | 6.06 (13.48) | NR | NR | NR |
| Huang et al., 2017, Taiwan | Physical functioning | EORTC QLQ-C30 | X |  |  |  |  | T0 | 90.59 (2.71) | 80.46 (4.87) | NR | NR | NR | High |
| T1 | 87.65 (2.89) | 81.44 (4.99) | NR | NR | NR |
| T2 | 84.23 (5.22) | 69.94 (8.49) | NR | NR | NR |
| T3 | 84.78 (5.23) | 71.13 (9.76) | NR | NR | 0.273 |
| Role functioning |  |  |  | X |  | T0 | 74.81 (5.21) | 73.29 (5.44) | NR | NR | NR |
| T1 | 68.73 (4.18) | 62.41 (6.15) | NR | NR | NR |
| T2 | 70.55 (6.84) | 61.17 (8.94) | NR | NR | NR |
| T3 | 70.39 (6.95) | 60.07 (9.18) | NR | NR | 0.807 |
| Huang et al., 2018, China | Exercise capacity | 6MWT | X |  |  |  |  | T0 | 347.40 (111.10) | 391.30 (114.70) | NR | NR | NR | High |
| T1 | 492.40 (112.40) | 400.30 (100.30) | NR | NR | NR |
| Change T0-T1 | NR | NR | NR | NR | **0.04** |
| Krug et al., 2021, Germany | Functional wellbeing | FACT-L |  |  |  | X |  | T1 | 13.4 (6.6) | 14.0 (6.0) | NR | NR | 0.555 | Some concerns |
| Li et al., 2019, China | Functional wellbeing | FACT-L |  |  |  | X |  | T2 | 13.2 (5.9) | 14.7 (5.7) | NR | NR | 0.301 | High |
| T3 | 14.4 (6.7) | 16.2 (6.5) | NR | NR | 0.287 |
| Change score | NR | NR | 0.52 | –0.41; 1.46 | 0.098 |
| Li et al., 2022, China | Physical wellbeing | FACT-L | X |  |  |  |  | T0 | 15.50 (3.91) | 14.95 (3.93) | 0.550 | -1.818; 2.918 | 0.649 | High |
| T1 | 17.20 (3.58) | 15.80 (5.06) |
|  | Functional wellbeing | FACT-L |  |  |  | X | T0 | 9.85 (2.98) | 9.05 (3.65) | 0.800 | -1.212; 2.812 | 0.436 |
| T1 | 12.25 (3.97) | 9.65 (2.78) |
|  | Fatigue | CRF |  |  | X |  | T0 | 50.80 (5.94) | 53.00 (5.64) | -2.200 | -5.697; 1.297 | 0.218 |
| T1 | 53.00 (5.64) | 54.00 (7.41) |
| Moore et al, 2002, UK | Physical functioning | EORTC | X |  |  |  |  | Baseline | 86.7 | 86.7 | NR | NR | NR | High |
| Month 3 | 86.7 | 86.7 | NR | NR | 0.22 |
| Month 6 | 86.7 | 86.7 | NR | NR | 0.27 |
| Month 12 | 86.7 | 86.7 | NR | NR | 0.50 |
| Role functioning |  |  |  | X | Baseline | 66.7 | 66.7 | NR | NR | NR |
| Month 3 | 66.7 | 66.7 | NR | NR | 0.26 |
| Month 6 | 66.7 | 66.7 | NR | NR | 0.48 |
| Month 12 | 66.7 | 50.0 | NR | NR | 0.14 |
| Fatigue |  |  | X |  | Baseline | 33.3 | 33.3 | NR | NR | NR |
| Month 3 | 33.3 | 33.3 | NR | NR | 0.58 |
| Month 6 | 33.3 | 33.3 | NR | NR | 0.97 |
| Month 12 | 33.3 | 33.3 | NR | NR | 0.68 |
| Dyspnea |  | X |  |  | Baseline | 25.0 | 25.0 | NR | NR | NR |
| Month 3 | 25.0 | 33.3 | NR | NR | 0.03 |
| Month 6 | 33.3 | 37.5 | NR | NR | 0.65 |
| Month 12 | 25.0 | 50.0 | NR | NR | 0.06 |
| Month 1 | 475 (86.5) | 335 (107) | NR | NR | NR |
| Mosher et al, 2016, USA | Fatigue frequency | the Fatigue Symptom Inventory |  |  | X |  |  | Baseline | 5.37 (2.17) | 5.69 (2.41) | NR | NR | NR | Some concerns |
| 2 weeks post-intervention | 5.17 (2.17) | 5.00 (2.57) |
| 6 weeks post-intervention | 5.27 (2.23) | 4.64 (2.71) |
| Group x time | NR | NR | NR | NR | 0.17 |
| Fatigue severity |  |  | X |  |  | Baseline | 4.25 (2.04) | 4.47 (2.09) | NR | NR | NR |
| 2 weeks post-intervention | 3.84 (2.03) | 3.81 (2.31) |
| 6 weeks post-intervention | 4.28 (2.47) | 3.63 (2.86) |
| Group x time | NR | NR | NR | NR | 0.40 |
| Breathlessness frequency | the Memorial Symptom Assessment Scale  the |  | X |  |  |  | Baseline | 1.73 (1.37) | 1.73 (1.35) | NR | NR | NR |
| 2 weeks post-intervention | 1.75 (1.44) | 1.86 (1.34) |
| 6 weeks post-intervention | 1.71 (1.41) | 1.98 (1.21) |
| Group x time | NR | NR | NR | NR | 0.62 |
| Breathlessness severity |  | X |  |  |  | Baseline | 1.35 (1.00) | 1.45 (1.09) | NR | NR | NR |
| 2 weeks post-intervention | 1.19 (0.95) | 1.48 (1.09) |
| 6 weeks post-intervention | 1.23 (0.97) | 1.43 (0.82) |
| Group x time | NR | NR | NR | NR | 0.80 |
| Mosher et al, 2019, USA | Fatigue | Fatigue symptom inventory |  |  | X |  |  | Baseline | 10.56 (0.83) | 10.04 (0.83) | NR | NR | NR | Some concerns |
| 2 weeks post-intervention | 10.83 (0.89) | 9.99 (0.92) | NR | NR | NR |
| 6 weeks post-intervention | 10.38 (0.89) | 10.43 (0.92) | NR | NR | NR |
| Group x time | NR | NR | NR | NR | 0.74 |
| Breathlessness | Four item PROMIS Scale  Memorial Symptom Assessment Scale |  | X |  |  |  | Baseline | 1.08 (0.19) | 1.05 (0.19) | NR | NR | 0.27 |
| 2 weeks post-intervention | 1.16 (0.21) | 0.84 (0.22) | NR | NR | NR |
| 6 weeks post-intervention | 1.19 (0.21) | 0.69 (0.22) | NR | NR | NR |
| Group x time | NR | NR | NR | NR | 0.69 |
| Ning et al., 2021, China | Fatigue | Cancer Fatigue Scale (CFS) |  |  | X |  |  | Before chemotherapy | 25.81 (2.03) | 26.04 (2.65) | NR | NR | **<0.001** | Some concerns |
| End of cycle 2 | 27.65 (2.39) | 27.57 (2.97) |
| End of cycle 4 | 24.58 (2.61) | 24.58 (2.61) |
| Peng et al., 2019, China | Fatigue | EORTC QLQ-C30 |  |  | X |  |  | Before treatment | 75.0 (18.8) | 71.7 (17.9) | NR | NR | NR | Some concerns |
| After treatment | 39.7 (9.9) | 65.7 (16.4) | NR | NR | **0.012** |
| 3-month follow-up | 42.7 (10.9) | 61.7 (15.4) | NR | NR | **0.016** |
| Dyspnea |  | X |  |  | Before treatment | 68.3 (17.1) | 62.0 (15.5) | NR | NR | NR |
| After treatment | 35.0 (8.8) | 53.3 (10.8) | NR | NR | **0.034** |
| 3-month follow-up | 38.0 (9.8) | 58.3 (11.8) | NR | NR | **0.024** |
| Porter et al., 2011, USA | Functional well-being | FACT-L |  |  |  | X |  | _ | NR | NR | NR | NR | NS | Some concerns |
| Physical well-being | X |  |  |  | _ | NR | NR | NR | NR | NS |
| Tan et al., 2019b, China | Dyspnea | MDASI-C |  | X |  |  |  | T0 | 3.29 (3.35) | 3.48 (3.10) | NR | NR | NR | Some concerns |
| T1 | 3.21 (3.18) | 3.30 (2.68) | NR | NR | NR |
| T2 | 3.29 (3.15) | 3.20 (2.47) | NR | NR | NR |
| Change T0-T2 | NR | NR | NR | NR | 0.732 |
| Fatigue |  |  | X |  | T0 | 6.69 (3.32) | 5.52 (3.55) | NR | NR | NR |
| T1 | 4.10 (2.69) | 5.39 (3.07) | NR | NR | NR |
| T2 | 3.58 (2.16) | 4.80 (3.17) | NR | NR | NR |
| Change T0-T2 | NR | NR | NR | NR | **<0.01 (adjusted p)** |
| Yang et al., 2018, Singapore and Finland | Functional wellbeing | FACT-L |  |  |  | X |  | At 12 weeks | 18.3 (7.4) | 21.0 (5.5) | –2.1 | –5.2; 1.0 | 0,19 | Some concerns |
| Physical well-being | X |  |  |  | At 12 weeks | 21.6 (6.8) | 22.2 (5.6) | 0.1 | -2.6 – 2.8 | 0.92 |
| Yanwei et al, 2018, China | Functional wellbeing (patients) | FACT-L |  |  |  | X |  | From baseline to week 12 | 2.0 (6.6) | 1.9 (7.8) | NR | NR | NS | Some concerns |
| Physical wellbeing | X |  |  |  | From baseline to week 12 | 2.1 (7.8) | 3.0 (8.8) | NR | NR | NS |
| Yount et al., 2013, USA | Physical wellbeing | FACT-G | X |  |  |  |  | Baseline | 20.6 (6.5) | 21.1 (5.9) | NR | NR | 0.553 | Some concerns |
| Week 12 | 20.3 (6.2) | 20.6 (5.3) | NR | NR | 0.731 |
| Functional wellbeing |  |  |  | X | Baseline | 16.1 (6.9) | 16.4 (6.6) | NR | NR | 0.728 |
| Week 12 | 15.8 (7.7) | 16.0 (7.1) | NR | NR | 0.887 |
| Linn et al., 1982,  Florida | Functional status | 16-item Rapid Disability Rating Scale |  |  |  | X |  | NR | NR | NR | NR | NR | NS | Some concerns |
| Schofield et al., 2013, Australia | Physical functioning | EORTC QLQ-C30 | X |  |  |  |  | T1 | 67.08 | 64.68 | NR | NR | 0.63 | High |
| T2 | 57.21 | 60.20 | NR | NR | 0.61 |
| T3 | 63.49 | 59.09 | NR | NR | 0.40 |
| Role functioning |  |  |  | X |  | T1 | 63.43 | 59.35 | NR | NR | 0.53 |
| T2 | 57.03 | 56.82 | NR | NR | 0.98 |
| T3 | 58.48 | 65.01 | NR | NR | 0.35 |
| Wangnum et al., 2013, Thailand | Fatigue | The revised Piper Fatigue Scale |  |  | X |  |  | T0 | 7 (33.3) | 14 (53.8) | NR | NR | 0.058 | High |
| T1 | 2.98 (1.96) | 3.99 (1.64) | NR | NR | **0.036** |
| Type 6: Other | | | | | | | | | | | | | | |
| Ahmedzai et al. 2004, UK | Distance walked (in meters) | 6MWT | X |  |  |  | Oxygen-enriched air control group |  | 214.2 (9.6) | 174.6 (11.2) | NR | 8.4; 70.6 | **<0.05** | Some concerns |
| Medical air control group | NR | 128.8 (10.3) | NR | 55.7; 114.9 | **<0.0001** |
| General extent of their dyspnoea at rest and on exertion | VAS |  | X |  |  | Oxygen-enriched air control group |  | 40.2 (4.8%) | 47.0 (5.6%) | NR | NR | NS |
| Medical air control group | NR | 59.3 (5.3%) | NR | 2.5; 35.7 | **<0.05** |
| Borg |  | X |  |  | Oxygen-enriched air control group | 2.5 (0.5) | 3.5 (0.6) | NR | NR | NS |
| Medical air control group | NR | 3.7 (0.6) | NR | NR | NS |
| Jiang et al., 2021, China | Dyspnea | NR |  | X |  |  |  | After 1 month | NR | NR | NR | NR | **<0.05** | High |
| Maddocks et al, 2009, UK | Quadriceps Muscle Strength | Cybex NORM dynamometer | X |  |  |  |  | Over a 5 week period | 7.4 | -2.0 | 9.4 | -1.3 – 20.7 | **0.08** | Some concerns |
| Exercise Endurance | ESWT | -20 | -159 | 138 | -118 – 394 | 0.27 |
| Free-Living Physical Activity | ActivPAL monitor | 136 | -633 | 768 | -1530 – 3066 | 0.48 |
| Maddocks et al, 2013, UK | General fatigue | MFI-20 |  |  | X |  |  | Baseline | 13 | 11 | NR | NR | > 0.05 | Some concerns |
| Post-chemo | 13 | 13 | NR | NR |
| Physical activity | ActivPAL accelerometer | X |  |  |  | Baseline | 3163 | 3362 | NR | NR | > 0.05 |
| Post-chemo | 2766 | 3332 | NR | NR |
| Role functioning | EORTC QLQ-C30 |  |  |  | X | Baseline | 67 | 83 | NR | NR | > 0.05 |
| Post-chemo | 83 | 66 | NR | NR |
| Physical functioning | X |  |  |  | Baseline | 73 | 87 | NR | NR | > 0.05 |
| Post-chemo | 67 | 80 | NR | NR |
| Ye et al., 2021, China | ADL score | ADL scale | X |  |  |  |  | Before nursing | 28.65 (5.11) | 26.82 (3.48) | NR | NR | 0.081 | Some concerns |
| After nursing | 49.27 (8.22) | 41.33 (5.18) | NR | NR | **<0.001** |

*Legende*

*PF = physical functioning; D= Dyspnoea; F=fatigue; RF= Role functioning*

*NS = the article reported that the results were not significant without reporting the exact p-value*

*Pre-op = pre-operative; post-op = post-operative*

***p-value: **** *= p<0,05****; ***** *= <0,01; *** = <0,001*

*RoB assessment*

*Low risk of bias: The trial is judged to be at low risk of bias for all domains for this result.*

*Some concerns: The trial is judged to raise some concerns in at least one domain for this result, but not to be at high risk of bias for any domain.*

*High risk: The trial is judged to be at high risk of bias in at least one domain for this result. Or The trial is judged to have some concerns for multiple domains in a way that substantially lowers confidence in the result.*
